1 **Impact of ecotourism on abundance, diversity and**  
2 **activity pattern of medium-large terrestrial mammals at**  
3 **Brownsberg Nature Park, Suriname**

4

5

6 Dimitri A. Ouboter<sup>1</sup>, Vanessa S. Kadosoe<sup>1</sup>, Paul E. Ouboter<sup>1\*</sup>

7

8

9

10 <sup>1</sup> Institute for Neotropical Wildlife and Environmental Studies, Paramaribo, Suriname

11

12

13 \* Corresponding author

14 E-mail: [paul.ouboter@neowild.org](mailto:paul.ouboter@neowild.org)

15

16

## 17 **Abstract**

18

19 The impacts of ecotourism on biodiversity are poorly understood and the outcome of  
20 research is often contradictory. On the one hand ecotourism could impact the occurrence,  
21 survival or behavior of species, on the other hand ecotourism is often mentioned as  
22 providing a “human shield” by deterring negative practices like gold mining, logging and  
23 hunting.

24 Brownsberg Nature Park is easily the most visited protected area of Suriname, with a  
25 high number of ecotourists visiting from abroad. A four-year study on the impact of  
26 ecotourism on medium-large terrestrial mammals was carried out between 2013 and 2016  
27 using 16 camera trapping stations. The area has a clear gradient of tourism pressure, with  
28 the pressure decreasing further away from the lodging facilities. Evidently, the impacts of  
29 human presence on the mammal communities were more significant in the busiest areas.  
30 Most species avoided areas with many hikers or switched to a more nocturnal activity  
31 pattern. In these areas the impact was not reflected in species numbers, however it was  
32 causing a significant lowering of the diversity of mammals. On the other hand, vehicles  
33 had little impact on species avoidance or diversity, but did increase nocturnality even  
34 more than hikers. A few species seemed to be "attracted" by hikers and/or traffic. Giant  
35 armadillos and spotted pacas used the pools in the road created by traffic. Ocelots,  
36 margays and red-rumped agoutis seemed to favor human disturbance probably because of  
37 predator release. Some of the most impacted species were the jaguar, puma and lowland  
38 tapir, all three species with significant contribution to ecosystem balance. Their  
39 avoidance or even disappearance from highly human frequented areas could easily result

40 in ecosystem changes in these areas. Management measures should focus on lowering the  
41 number of hikers in popular places and limiting the number of vehicles in recreational or  
42 tourist areas.

43

## 44 **Introduction**

45

46 Ecotourism is generally regarded as beneficial for the protection of natural areas and is  
47 therefore expected to aid in the preservation of biodiversity [1, 2]. Local communities  
48 may also benefit from the resulting economic turnover when involved in these projects,  
49 which can ultimately support a change from unsustainable resource extracting practices to  
50 sustainable conservation-oriented practices [3, 4]. While ecotourism is perceived to be a  
51 sustainable activity, the actual benefits and ecological consequences are poorly  
52 understood, and more research still needs to be done in this field [1]. Ecotourism plans  
53 for nature parks seldom take into account the potential negative impact from the very act  
54 of practicing ecotourism in said areas and should therefore include long-term monitoring  
55 and management of these effects [5, 6]. Ecotourism, which is defined as "responsible  
56 travel to natural areas that conserves the environment, sustains the well-being of the local  
57 people, and involves interpretation and education" [7], is certainly a commendable  
58 endeavor. However, to fulfill every aspect of this definition, is not an easy task and many  
59 ecotourism projects may fail in some of these promises. Studies have shown that  
60 involvement of the local community also helps in long-term sustainability of ecotourism  
61 in protected areas [2]. In the established exploitation of many protected areas, the  
62 involvement of local communities is overlooked (e.g. [8, 9]), and with that a failed

63 comprehension of their significant contribution to environmental awareness and  
64 conservation [1]. Knowledge of the impact of tourist visitation on neotropical wildlife is  
65 still largely lacking. With an increasing trend in ecotourism, it is very important to  
66 determine any detrimental effects of tourism activities on the environment.

67

68 Results from studies so far, on the influence of ecotourism on biodiversity in the  
69 neotropics, have presented impacts that have ranged from little to noticeable negative  
70 effects [3, 6, 10, 11]. These differences may reflect contrasts in management strategies  
71 (e.g. max tourist density allowed) and ecosystem resilience, highlighting the importance  
72 of collaboration between ecologists and management authorities in creating sustainable  
73 ecotourism practices. Negative effects that have been documented includes increased  
74 stress, changes in behavior or disappearance from landscapes [4, 6, 10, 12]. Such changes  
75 can ultimately lead to decreased reproductive success in animals, lowering species  
76 abundance which can have cascading ecological effects, even leading to the extirpation of  
77 certain species. Community structures can change, giving rise to fluctuations in- and  
78 between species [13]. A decrease in abundance and diversity of species will be  
79 disadvantageous for local communities, the economy as well as for ecotourism. While the  
80 primary role of protected parks is the conservation of biodiversity and natural landscapes,  
81 which would be best achieved with minimal anthropogenic disturbances, the  
82 contradicting economic incentive for management entities to generate income for  
83 maintenance and development in the park often drives tourist numbers up. Consequently,  
84 the sustainable management of ecotourism ventures becomes a challenging endeavor.

85 Infrastructure developments (e.g. roads, lodges) and park restrictions have to be carefully

86 planned, aligned and managed to minimize the damage to the natural resources which the  
87 park is aiming to protect.

88

89 In Suriname, which has not been very tourism oriented in the past, ecotourism is an  
90 upcoming industry [14]. With 93% of the country covered by rainforests [15], most of  
91 which is pristine in the central, western and southern parts, and 14.5% of the land area  
92 being protected [16], the potential for ecotourism is remarkable. Suriname was the first  
93 country in the Western Hemisphere to issue nature preservation legislation. The hunting  
94 law of 1954 prohibits hunting of all mammals except game species, with restrictions to  
95 certain seasons and number of kills a person is allowed to make per species per hunting  
96 trip. In practice however, there is almost no control and regulation over hunting practices.  
97 Although local communities are allowed to hunt within protected areas, non-locals have  
98 been known to partake in this activity as well. There are also largely unregulated mining  
99 operations (both legal and illegal) occurring in different parts of the country, and even  
100 within protected areas [17]. Logging operations are well-regulated on paper, but  
101 environmental restriction and concession borders are often not observed. This presents a  
102 danger to the integrity of protected areas across the country. Ecotourism can possibly help  
103 to shift from these destructive land uses to a more sustainable conservation-oriented  
104 practice. Here, we will be focusing on Brownsberg Nature Park (BNP), which  
105 experiences both of the above-mentioned pressures near its borders, as well as hosting  
106 ecotourism. Since the establishment of the park in 1970 [18], tourism has risen (largely  
107 uncontrolled) in BNP. It has become one of the most visited tourist sites in Suriname,  
108 with approximately 17,000 visitors in 2001 [5]. To experience the richness of the park,

109 tourists have the option to travel by foot to several waterfalls, creeks, or scenic  
110 viewpoints. The trend herein is that the largest proportion of tourists chooses the least  
111 intensive journeys (i.e. the locations within the shortest distance from the lodging  
112 facilities). This creates variability in the amount of tourist pressure on different parts of  
113 the park and makes it ideal for an ecotourism impact study.

114

115 This study aimed to investigate the effects of ecotourism pressure on the presence,  
116 community composition, and behavior of medium-large terrestrial mammals by  
117 comparing photo captures in areas of the park with varying tourist and traffic pressure.

118 This data was gathered during a 4-year continuous camera trapping monitoring study. We  
119 predicted that impacts on occurrence, diversity, and behavior of mammals would be more  
120 pronounced in areas with the highest tourist and traffic pressure. Ecotourism was shown  
121 to impact the behavior of many species displayed as avoidance of busy tourist routes or  
122 changing to a more nocturnal activity pattern. Mammal diversity was inversely correlated  
123 to tourist numbers.

124

125

## 126 **Methods and study area**

127

### 128 ***Study area***

129

130 Brownsberg Nature Park (5°01'N, 55°34'W) was established in 1970 as a protected  
131 rainforest area of approximately 12,200 hectares and is Suriname's only nature park [16].

132 It is situated northwest of the Brokopondo Reservoir, about 90 km south of the capital  
133 Paramaribo (Fig 1). Brownsberg is a ferro-bauxite capped mountain with a 470-530 m  
134 high plateau that stretches approximately 34 km in length and 13.5 km in width at its  
135 widest point [19]. The area is covered by humid forest and hosts a wide variety of  
136 habitats due to its wide range of elevations, steep slopes and gullies [5, 20]. This creates  
137 high diversity within a small area which is illustrated by the diverse fauna and flora,  
138 including endemic species which can also be found within the park [5]. Brownsberg  
139 Nature Park is home to at least 125 species of mammals consisting of “ten opossums, five  
140 pilosans, four armadillos, 58 bats, eight primates, 13 carnivores, five ungulates, and 22  
141 rodents” [21]. This includes all of the felid and primate species known to occur in  
142 Suriname. Most of the surface area of Brownsberg is covered by mesophytic and meso-  
143 xerophytic rainforest. Other habitats occurring in the Park include xerophytic low forest,  
144 bamboo-liana forest, marshy streamside forest and swamp-marsh forest [19]. The climate  
145 is tropical, with two wet seasons (April/May to August and December to January) and  
146 two dry seasons (February to April and August to November/December) [19]. During the  
147 night and early morning precipitation is often enhanced by mist. Temperatures ranges  
148 from 19 to 30 °C and rainfall is approximately 1985 mm/year [19]. Most of the plateau  
149 and slopes within the park are in an almost pristine state. Small artifacts of Pre-  
150 Colombian Amerindians were found in the area [22], however, apart from a few bamboo  
151 thickets, nothing in the natural habitat reminds one of this history. From the late 17th  
152 century till 1964, Maroon (escaped slaves) villages occurred at the middle Suriname  
153 River, east of Brownsberg. According to De Dijn et al [19] "The eastern Brownsberg  
154 foothills was likely the outer limits of areas used for slash-and-burn agriculture .....,

155 while the Brownsberg range itself was a tribal hunting ground". At the end of the 19th –  
156 and beginning of 20th century there was a short period of small-scale gold mining  
157 activities at the mountain. Some remnants of this period can still be found in some of the  
158 creek valleys. During the same period natural rubber was exploited in the forest of  
159 Brownsberg (locally known as balata bleeding) [19]. With the establishment of the  
160 Brokopondo Reservoir in 1964, the inhabitants of 11 Maroon villages of the middle  
161 Suriname River were translocated to Brownsweg, a settlement to the north of the  
162 Brownsberg mountain [23]. In 1970 the mountain received protection as a nature park  
163 [18]. This short history explains the relatively pristine condition of the more remote,  
164 southern part of the plateau and slopes, with hardly any recent hunting or logging, nor  
165 disturbance from tourism. However, disturbance at the foot of the mountain and on the  
166 northern and eastern lower slopes is more pronounced. The gold rush has rekindled since  
167 approximately 1985 [24]. Gold mining operations have affected more than 661 ha of the  
168 park that is situated in the lowland [17]. Evidently, hunting and logging activities also  
169 occur in the lowland areas surrounding the mountain and at the lower slopes, mostly by  
170 inhabitants from the nearby villages of Brownsweg [5]. Part of the plateau of Brownsberg  
171 is still a bauxite concession of SURALCO (Surinam Aluminum Company), although no  
172 active bauxite mining has ever taken place. The study area is surrounded in three  
173 directions by “ecological barriers”. To the North-West are gold mining operations, to the  
174 North is the Brownsweg village, to the East is the Brokopondo Lake, and to the South-  
175 East are more gold mining operations. However, there is a wide, relatively undisturbed  
176 corridor to the South-West.

177



178 **Fig 1. Location of study area and camera trap stations.**

179 Also shown is the road going up the mountain from Brownsweg village and continuing  
180 on the plateau as Mazaroni Road. PP (Pedreku Pasi) Road and Jeeptrail were closed for  
181 traffic. Also indicated are trails leading to waterfalls, creeks and viewpoints.

182

183 Tourists can rent lodging facilities located on the northern part of the plateau (Fig 1),  
184 which can be reached through a road coming in from the North-East and starting at  
185 Brownsweg. This road continues as Mazaroni Road, the main road to the South-West of  
186 the plateau until it reaches the Telesur telecommunication tower. The other part of this  
187 road named Pedreku Pasi, which continues to the West and South on the central and  
188 southern part of the plateau, is closed for traffic (the PP Road locations in Fig 1). Another  
189 closed road splits off from the main road in southwestern direction and going downhill to  
190 the Witi Creek (Jeeptrail in Fig 1). Several hiking trails lead to waterfalls, creeks or  
191 viewpoints (Leo Fall, Koemboe Fall, Mazaroni Fall, Mazaroni Top and Witi Creek in Fig  
192 1).

193 The northern part of the plateau with the lodging facilities, roads and several hiking trails  
194 is somewhat disturbed as a result of tourism activities. Disturbance decreases further  
195 away from the lodging facilities. The closed roads are considered to be in the most  
196 pristine parts of the park.

197

198 ***Camera trap survey***

199

200 The camera trapping study was conducted from December 2012 to December 2016.

201 Mostly Reconyx PC900 cameras, containing a covert infrared flash, were used during the  
202 study. Cameras were attached to trees between 30 to 80 cm (depending on the viewing  
203 angle from tree to trail) above the ground and secured with a Python lock. Cameras were  
204 set to take five rapid (<1 second interval) photos upon detection of a moving (warm)  
205 object, after which the camera had a delay of three minutes before arming again. A total  
206 of 16 camera stations with single or double camera setups were employed on different  
207 roads and trails (Fig 1). The double camera stations (one camera on each side of the trail  
208 or road) aided in capture maximization and provided photographs of both flanks of  
209 animals to assure individual identification of some species. Cameras were serviced each  
210 month to replace batteries, memory cards and desiccant, and for overall cleaning of the  
211 equipment.

212

### 213 ***Data analysis***

214

215 For the analysis, medium-large terrestrial mammals were defined as species with a  
216 bodyweight usually greater than 1 kg as an adult. This means that the smaller opossums  
217 (*Philander opossum*, *Metachirus nudicaudatus* and mouse opossums of the genus  
218 *Marmosa*), mice and rats were excluded from the analysis. Also, principally arboreal  
219 mammal species, such as squirrels and monkeys, were excluded from the data analysis.  
220 All photos were identified to either species of animal (using [25]) or classified as type of  
221 trigger by humans (e.g. tourist, vehicle, bicycle, hunter, gold miner). The species as  
222 opposed to the number of specimens was counted in each photo trigger (e.g. one peccary  
223 equals one trigger, but a group of ten peccaries also equals one trigger). When two or

224 more consecutive triggers were of the same species, the first was counted and the second  
225 only after 30 minutes had passed since the first trigger. This measure was applied to  
226 prevent multiple counts of the same individual of several species that may linger in front  
227 of a camera for longer periods (agoutis, peccaries and armadillos) or may reappear after a  
228 short while (pumas). On the contrary, consecutive triggers by hikers or vehicles, were  
229 counted irrespective of time between triggers.

230 Common and scientific names are according to the IUCN Red List [26].

231

232 Human presence (hikers, vehicles, including noise and other related disturbances  
233 associated) usually has a negative impact on animals, and may cause avoidance which is  
234 reflected in a change in abundance, distribution, home range or activity pattern of species.  
235 However, human activities may also have a positive impact on some species by creating  
236 additional (usually open) habitats, pools, road connections, providing additional food  
237 and/or release from predation or competition. To evaluate the impact of tourist hikers or  
238 vehicles on the mammal community, we correlated tourist or traffic pressure, represented  
239 as number of triggers by hikers or vehicles, to species numbers and mammal diversity per  
240 camera station. Pearson correlation coefficient was used to evaluate the extent of  
241 correlation between explanatory variables. The species diversity was calculated using  
242 Simpson's Diversity Index [27], as being the most stable and easy to interpret diversity  
243 index [28]. The relative abundance index (RAI) was calculated for each species as the  
244 number of camera triggers per 100 trap days [29, 30]. Heatmaps were created using the  
245 Heatmap algorithm in QGIS 3.12.0 to visualize species RAI (root transformations were  
246 made for most species data because of the skewness of the data) in relation to

247 disturbance. The impact of ecotourism on the mammal community was further  
248 investigated using Principal Component Analysis (PCA). The best groupings from PCA  
249 analysis were further evaluated with an Analysis of Similarity (ANOSIM) [31].

250

251 We used R version 3.5.1 for the analyses [32]. We compared activity patterns of various  
252 mammal species between locations with undisturbed conditions and locations with many  
253 hikers or heavy traffic. In overlap (v0.3.2) [33] we fitted the activity patterns of species  
254 pairs and estimated the degree of overlap by providing a coefficient of overlap (delta).  
255 Delta ( $\Delta$ ) is given as a number between 0 (indicating zero overlap in activity) and 1  
256 (indicating complete overlap in activity). Following the recommendations of [34], we  
257 used the Dhat1 estimator when the smallest sample size was less than 50, otherwise we  
258 used the Dhat4 estimator. Since overlap is a descriptive statistic, we complemented it  
259 with Watson's  $U^2$  test found in the package circular (v0.4-93) [35]. This non-parametric  
260 statistic is used to test for significant differences in two samples of circular data. The  
261 package suncalc (v0.5.0) [36] was used to extract sunlight phases for the study area. The  
262 percentage of diurnal, nocturnal and crepuscular activity was determined for each species  
263 in the different locations. Cathemeral activity was chosen as activity between  
264 astronomical dawn and sunrise and activity between sunset and astronomical dusk. Nine  
265 mammal species with primarily cathemeral, diurnal or crepuscular activity were chosen  
266 for comparison between areas.

267

268 In order to put "disturbance" into perspective, locations with on average more than 50  
269 triggers by hikers in the busiest month of the year were included. "Heavy traffic" meant

270 that in the busiest month of the year on average between 60 and 960 vehicles could  
271 trigger a camera. A trigger by a tourist could involve just one single tourist but also a  
272 group of several tourists.

273

## 274 Results

275

276 The four years of camera trapping corresponded with 17,520 trap days, during which the  
277 cameras were triggered 70,071 times by an animal, human or car. Tourists caused the  
278 highest number of camera triggers (42%), followed by vehicles (36%) and only 22% of  
279 the triggers was by a medium-large terrestrial mammal. Most triggers by mammals were  
280 caused by red-rumped agoutis (RAI 45.31), pumas (RAI 9.06), jaguars (RAI 6.11) and  
281 ocelots (RAI 6.08) (Table 1). A total of 29 species of medium-large terrestrial mammals  
282 were photographed. Nine species (31%) were photographed only after the first year, and  
283 four (14%) only after the second year. From the third year on, no new species were added  
284 up till 2020 (unpubl. data).

285

286 **Table 1. Annual camera triggers by medium-large terrestrial mammals, tourists and**  
287 **traffic between 2013-2016.**

288 RAI (Relative Abundance Index) is the number of triggers per 100 trap days.

289

| Species                    | Common name       | 2013  | 2014  | 2015  | 2016  | 4 years | RAI   |
|----------------------------|-------------------|-------|-------|-------|-------|---------|-------|
| <i>Dasyprocta leporina</i> | Red-rumped agouti | 1,529 | 2,180 | 2,315 | 1,914 | 7,938   | 45.31 |
| <i>Puma concolor</i>       | Puma              | 419   | 377   | 405   | 387   | 1,588   | 9.06  |
| <i>Panthera onca</i>       | Jaguar            | 287   | 331   | 281   | 171   | 1,070   | 6.11  |
| <i>Leopardus pardalis</i>  | Ocelot            | 216   | 279   | 335   | 235   | 1,065   | 6.08  |

|                                  |                                 |       |       |       |       |        |        |
|----------------------------------|---------------------------------|-------|-------|-------|-------|--------|--------|
| <i>Mazama americana</i>          | Red brocket                     | 127   | 140   | 90    | 205   | 562    | 3.21   |
| <i>Didelphis marsupialis</i>     | Common opossum                  | 45    | 87    | 113   | 218   | 463    | 2.64   |
| <i>Cuniculus paca</i>            | Spotted paca                    | 81    | 135   | 119   | 113   | 448    | 2.56   |
| <i>Myoprocta acouchy</i>         | Red acouchi                     | 83    | 60    | 125   | 113   | 381    | 2.17   |
| <i>Mazama nemorivaga</i>         | Amazonian brown brocket         | 93    | 74    | 92    | 52    | 311    | 1.78   |
| <i>Dasypus kappleri</i>          | Greater long-nosed armadillo    | 13    | 81    | 118   | 94    | 306    | 1.75   |
| <i>Dasypus novemcinctus</i>      | Nine-banded armadillo           | 59    | 21    | 51    | 124   | 255    | 1.46   |
| <i>Tapirus terrestris</i>        | Lowland tapir                   | 31    | 101   | 25    | 32    | 189    | 1.08   |
| <i>Leopardus wiedii</i>          | Margay                          | 18    | 23    | 30    | 32    | 103    | 0.59   |
| <i>Priodontes maximus</i>        | Giant armadillo                 | 10    | 21    | 38    | 30    | 99     | 0.57   |
| <i>Eira barbara</i>              | Tayra                           | 14    | 26    | 18    | 24    | 82     | 0.47   |
| <i>Herpailurus yagouaroundi</i>  | Jaguarundi                      | 5     | 8     | 23    | 16    | 52     | 0.30   |
| <i>Nasua nasua</i>               | South American coati            | 11    | 16    | 4     | 14    | 45     | 0.26   |
| <i>Pecari tajacu</i>             | Collared peccary                | 10    | 20    | 3     | 10    | 43     | 0.25   |
| <i>Tayassu pecari</i>            | White-lipped peccary            | -     | 16    | 4     | 14    | 34     | 0.19   |
| <i>Myrmecophaga tridactyla</i>   | Giant anteater                  | 1     | 3     | 3     | 3     | 10     | 0.06   |
| <i>Tamandua tetradactyla</i>     | Southern tamandua               | -     | 4     | 3     | 2     | 9      | 0.05   |
| <i>Speothos venaticus</i>        | Bush dog                        | 5     | -     | 1     | -     | 6      | 0.03   |
| <i>Procyon cancrivorus</i>       | Crab-eating raccoon             | -     | -     | 4     | -     | 4      | 0.02   |
| <i>Didelphis imperfecta</i>      | Guianan white-eared opossum     | -     | -     | 2     | 1     | 3      | 0.02   |
| <i>Hydrochoerus hydrochaeris</i> | Capybara                        | -     | 2     | -     | 1     | 3      | 0.02   |
| <i>Cabassous unicinctus</i>      | Southern naked-tailed armadillo | -     | 1     | -     | 2     | 3      | 0.02   |
| <i>Galictis vittata</i>          | Greater grison                  | -     | -     | 1     | -     | 1      | 0.01   |
| <i>Leopardus tigrinus</i>        | Northern tiger cat              | -     | 1     | -     | -     | 1      | 0.01   |
| <i>Coendou prehensilis</i>       | Brazilian porcupine             | -     | -     | 1     | -     | 1      | 0.01   |
|                                  |                                 |       |       |       |       |        |        |
|                                  | Tourists                        | 7,533 | 7,669 | 7,295 | 7,303 | 29,800 | 170.09 |
|                                  | Bicycles                        | 81    | 88    | 58    | 22    | 249    | 1.42   |

|  |          |       |       |       |       |        |        |
|--|----------|-------|-------|-------|-------|--------|--------|
|  | Vehicles | 4,263 | 7,496 | 5,877 | 7,311 | 24,947 | 142.39 |
|--|----------|-------|-------|-------|-------|--------|--------|

290

291 The Pearson correlation between the number of species and tourists or cars was not  
292 significant. It would otherwise be expected that an increase in disturbance would result in  
293 a decrease in the number of species. On the contrary, the second busiest trail, to Mazaroni  
294 Top, had the highest number of species. However, there was a significant negative  
295 correlation between the annual number of tourists and Simpson's Diversity Index ( $r=-$   
296  $0.622$ ,  $p=0.01$ ) (Fig 2) and a significant positive correlation between the distance to the  
297 tourist center and Simpson's Diversity Index ( $r=0.709$ ,  $p=0.002$ ) (Fig 3).

298

299 **Fig 2. Impact of the annual number of tourist triggers per camera station on the**  
300 **Simpson's Diversity Index (1/D).**

301

302 **Fig 3. Correlation between the distance of a camera station to the tourist center (in**  
303 **km) and the Simpson's Diversity Index (1/D).**

304

305 The Pearson correlation between individual mammal species and the number of tourists  
306 was significantly positive for the margay, ocelot and spotted paca and significantly  
307 negative for the lowland tapir, jaguar and collared peccary (Fig 4). The correlation  
308 between individual species and the number of cars was significantly positive for the  
309 spotted paca ( $r=0.503$ ,  $p=0.047$ ) and negative for collared peccary ( $r=-0.649$ ,  $p=0.006$ ).

310

311 **Fig 4. Pearson correlation (r) between the annual number of tourist triggers per**  
312 **camera site and various mammal species.**

313 Solid gray - r is not significant ( $p > 0.05$ ); striped gray bars - r is significant ( $p < 0.05$ ).

314

315 The heat maps in Fig 5 illustrate the impacts of the significant correlation between  
316 species and tourists and/or cars. The top maps of Fig 5 illustrate that Leoval and  
317 Mazarontop are the most frequented sites by tourists. Significantly fewer tourists hiked  
318 to the other more remote trails of the park or continued on the Mazaroni Road to the  
319 south of the plateau. Hardly any tourist entered the roads that are permanently closed for  
320 traffic. Most drivers, after reaching the plateau, are inclined to leave their vehicles at the  
321 parking lot near the lodging facilities. This explains the limited number of vehicles that  
322 continued on the Mazaroni Road to the South. However, a greater amount of traffic that  
323 still occurs in this part of the plateau can be attributed to the telecommunication company  
324 (Telesur) which performs frequent maintenance services at their communication tower.  
325 The only two vehicles that were ever registered on the closed roads were related to a one-  
326 time visit by law-enforcement personnel on All-Terrain Vehicles.  
327 According to Fig 5, collared peccaries avoided both hikers and traffic and were mostly  
328 recorded on closed roads and the trail to Witi Creek. Tapirs mostly avoided hikers and  
329 were mainly seen on the closed roads. However, on several occasions they were recorded  
330 from localities with limited traffic, especially towards the end of Mazaroni Road. Jaguars  
331 seemed to be mostly following the wider roads, and this also included roads with traffic.  
332 However, heavy traffic pressure caused a change in their behavior from a cathemeral to a  
333 more nocturnal activity pattern (see below). Jaguars appeared to avoid narrow trails with  
334 a high frequency of hikers. On the contrary, positive correlations were found for the  
335 margay, ocelot, and paca: Margays were often recorded at localities with many tourists



336 (at night), for ocelots, this was especially the case at roads, while pacas seemed to be  
337 most abundant at camera stations near pools in the road.

338

339 **Fig 5. Heat maps with red borders indicating disturbances (hikers and traffic) and**  
340 **heat maps with black borders indicating species.**

341 Negatively impacted species on the left, positively impacted species on the right. RAI -  
342 relative abundance index is displayed as number of triggers per 1,000 trap days for better  
343 visualization.

344

345 The Principal Component Analysis graph (Fig 6) shows that the closed roads, i.e. the  
346 undisturbed locations, were grouped in the right upper corner. Species with a preference  
347 for this area were tapir, red acouchi, collared peccary, white-lipped peccary and  
348 jaguarundi. These were also the species with a negative correlation with tourist numbers  
349 shown in Fig 4. The jaguar was however an evident vector missing in the right upper  
350 corner of Fig 6. The more disturbed locations are grouped to the left side of axis 1 and the  
351 species that triggered the cameras more often in these areas are the margay, ocelot, paca,  
352 red brocket, red-rumped agouti and giant armadillo. These are the same species that  
353 showed a positive correlation with tourist numbers (see Fig 4). The other species of  
354 armadillos are projected in between these two areas. ANOSIM results for all groups are  
355 significant ( $r=0.228$ ,  $p=0.012$ ). Pairwise tests between groups are only significant  
356 between "Many tourists" and "No tourists or cars" ( $r=0.592$ ,  $p=0.028$ ).

357

358 **Fig 6. PCA plot of camera stations with species grouped according to level of**

359 **disturbance.**

360

361 Besides the impact of the number of tourists and cars on the occurrence/occupancy of  
362 several individual mammal species and diversity of the mammal community in general,  
363 disturbances may likely have an impact on the behavior of mammals by increasing  
364 avoidance of people and traffic. Hiking and driving on the roads and trails are, for more  
365 than 90%, diurnal activities. For species that are cathemeral, diurnal, or crepuscular,  
366 avoidance of human activities may be accomplished by a shift in their activity pattern.  
367 Shifts in activity patterns due to disturbance by hikers and vehicles are statistically  
368 significant for the jaguar and puma (Fig 7). Both species had a shift to more nocturnal  
369 activity, and this was rather noticeable due to traffic rather than hikers. The shift to more  
370 nocturnal activity for the ocelot was solely due to the significant impact of hikers.  
371 Shifts in the activity of diurnal non-predatory species, due to disturbance, were usually  
372 not significant and resulted mostly in less activity in the late afternoon and an increase in  
373 activity in the early morning (Amazonian brown brocket, red acouchi, red-rumped agouti)  
374 (Fig 8). This was in contrast to the cat species. Traffic caused a shift in the activity  
375 pattern of the nine-banded armadillo to more activity in the early night.  
376 Changes in activity patterns due to human disturbance are further illustrated in Fig 9.  
377 The impacts of human disturbance were most noticeable on jaguars, changing their 59%  
378 diurnal activity to 20% as a result of hikers, and only 11% remaining with heavy traffic.  
379 Pumas followed the same pattern although those shifts are less pronounced. Ocelots are  
380 usually more nocturnal than the larger cats, but nonetheless, their 28% diurnal activity in  
381 undisturbed areas, diminished to 4-5% in disturbed areas. Amazonian brown brockets

382 avoided the presence of hikers with a slight shift to more crepuscular and nocturnal  
383 activity (18% less diurnal activity). Traffic did not seem to have an impact on their  
384 diurnal activity. Red acouchi on the contrary became more crepuscular due to traffic, with  
385 a shift of 12%. No effect was seen in the other species.

386

387 **Fig 7. Differences in activity patterns of several cathemeral and nocturnal predators**  
388 **between undisturbed areas and areas with a high number of tourists (left) and many**  
389 **vehicles (right).**

390

391 **Fig 8. Differences in activity patterns of several diurnal, cathemeral and nocturnal**  
392 **non-predator species between undisturbed areas and areas with a high number of**  
393 **tourists (left) and many vehicles (right).**

394

395 **Fig 9. Activity patterns of several mammal species divided into nocturnal, diurnal**  
396 **and crepuscular percentages, compared between undisturbed sites and sites with**  
397 **many tourist hikers or vehicles.**

398

## 399 **Discussion**

400

401 In a comparison of the mammal communities of seven tropical rainforest sites, the  
402 Central Suriname Nature Reserve came out as the richest with 28 species (including small  
403 mammals too) [37]. This illustrates that Brownsberg Nature Park, with 29 medium-large  
404 terrestrial mammal species, is one of the richest areas in the tropics.

405 Camera triggers (RAI) were very high for the red-rumped agouti (45.31), puma (9.06),  
406 and jaguar (6.11), even higher than the numbers reported for the period 2013-2015 for the  
407 same area [38]. These are the highest number of camera triggers (per 100 trap days)  
408 reported for agouti [39-45] and puma [39, 40, 46-48], and one of the highest reported for  
409 jaguar (see overview in [49]). The density estimates for the jaguar population of  
410 Brownsberg, calculated from a nine-year study was also relatively high, varying between  
411 0.51 and 4.21 individuals/100km<sup>2</sup> [50].

412

413 Camera trapping is often mentioned as an excellent method to study elusive and rare  
414 species (e.g. [51]). Our results support the efficiency of the camera trapping method for  
415 studying relatively abundant elusive species, however not for rare species. Only 69% (20  
416 species out of 29) of species present in the area were photographed during the first year,  
417 and 14% of species (4) were recorded only in the third year.

418

419 The results of this study highlighted that (eco)tourism had an impact on the mammal  
420 community of Brownsberg Nature Park. An increase in the number of tourists on the road  
421 and trails resulted in a decline in the mammal diversity. Several species seemed to avoid  
422 areas with noticeable human activity, especially lowland tapir, jaguar, collared peccary,  
423 red acouchi, jaguarundi, Amazonian brown brocket and puma. Avoidance of areas with  
424 high human traffic (in this case researchers) was also reported for several large mammals  
425 in a rainforest area at Gunung Leuser National Park (Sumatra, Indonesia) [52]. A similar  
426 study at the Tiputini Biodiversity Station in Ecuador [53] examined the correlation  
427 between human traffic on rainforest trails and mammal functional groups. They only

428 found human traffic to have a (negative) effect on ungulates. They recorded the strongest  
429 negative effect for the white-lipped peccary and lowland tapir, whereas a weaker  
430 correlation with red brocket and collared peccary was noted. The Amazonian brown  
431 brocket had too low numbers to be analyzed separately [53]. The results from our study  
432 showed a similar negative correlation with all ungulates except the red brocket, which  
433 showed a not significant positive correlation. Similarly, the Amazonian brown brocket  
434 showed a negative correlation with the number of hikers. The activity pattern of the  
435 Amazonian brown brocket appeared to be diurnal versus a cathemeral activity pattern for  
436 the red brocket, which may explain the difference in correlation. Red brockets have been  
437 visually observed during our study near the tourist lodges by tourists and by the research  
438 team, on some occasions even with a juvenile in tow. This may represent a true example  
439 of spatial refuge of prey in spaces where predator displacement occurs due to human  
440 activity, although the effect is not strong enough to show statistical significance. The red  
441 brocket may show more behavioral plasticity, which may also explain the different results  
442 found in [53]. However, we argue that the results of [53] may still be suffering from  
443 limitations, as their research was only carried out from January to March (60 days) during  
444 three years with a limited number of camera stations.

445 The margay, ocelot, and spotted paca showed a significant positive correlation with the  
446 number of hikers. This correlation was also positive for the giant armadillo and red-  
447 rumped agouti. We assumed that the paca and giant armadillo were most likely attracted  
448 to the pools in parts of the road, which had otherwise heavy traffic. These two species  
449 showed a significant affinity with the pools in parts of the roads, a behavior regularly  
450 captured on photographs primarily at night.

451 The explanation for a positive correlation between the high numbers of hikers and the  
452 margay, ocelot, and red-rumped agouti can be sought in a possible partial release of  
453 potential predation or competition by the jaguar and puma, which both slightly avoid  
454 areas with high human disturbance. Jaguars and pumas are known to kill smaller cats  
455 [54], and it was even reported that ocelots may represent a significant portion of the diet  
456 of jaguars during the wet season in the Talamanca mountains of Costa Rica [55]. Release  
457 of predation was also reported by [56] who performed a mammal community analysis  
458 and discovered some spatial separation of predators and prey, with prey more likely to  
459 occur around humans. While margays typically prey on small mammals, ocelots regularly  
460 prey on medium-sized mammals [57, 58]. On Barro Colorado Island in Panama, agoutis  
461 (*Dasyprocta punctata*) are a significant prey item for ocelots [59, 60]. Competitive  
462 release from jaguars creates a shift in the diet of ocelots, allowing ocelots to take larger  
463 prey than in areas where jaguars still occur [61]. Although agoutis can be preyed upon by  
464 jaguars, pumas, and ocelots alike, they are more likely to survive attacks by ocelots (e.g.  
465 [59]). Hence, the effect for ocelots may be two-fold, on the one hand by the absence of  
466 jaguars and pumas and on the other by attraction to agoutis.

467

468 Although there seemed to be little impact of traffic on species numbers and community  
469 diversity, traffic still had the highest impact on the activity pattern of the three largest  
470 cats. It resulted in a shift in their activity pattern from daytime to mostly nighttime  
471 activity.

472 Shifts in mammal activity were also noted due to the presence of hikers, mostly shifting  
473 parts of their diurnal activity to nocturnal (cats) or concentrating diurnal activity primarily

474 in the morning (Amazonian brown brocket and red-rumped agouti). The shift from  
475 afternoon activity to mainly morning activity can probably be explained by a higher  
476 tourist activity in the afternoon hours compared to the morning. The shift from early  
477 morning to evening activity in the nine-banded armadillo as a result of heavy traffic, may  
478 very well be a secondary effect caused by the shift of jaguar and puma activity to mainly  
479 early morning.

480 Shifts in activity pattern were also reported by [62] for the cheetah in Amboseli National  
481 Park (Kenya), by becoming more crepuscular in an avoidance strategy in response to  
482 tourists. In Sumatra, the sun bear and tiger changed their activity pattern from mostly  
483 diurnal to nocturnal in areas of high human traffic [52]. Seventy-six studies on the human  
484 impact on daily activity patterns of animals were analyzed by [63] and they concluded  
485 that there was a significant increase in nocturnality in response to human disturbance.  
486 Seven studies were from tropical South America, however, none of these involved the  
487 effects of tourism. The temporary closure of a highly visited national park in Thailand  
488 resulted in leopards becoming more diurnal in the absence of tourist disturbance [64]. A  
489 study in the Atlantic Forest in Argentina/Brazil reported increased nocturnality in pumas  
490 in disturbed areas [65].

491 Nocturnal mammals may experience less of a hindrance than diurnal species because  
492 most tourist activity on the trails happens in the daytime. Therefore, it was expected that  
493 diurnal mammals would primarily be affected to a greater extent by tourism than  
494 nocturnal mammals. This was true for the collared peccary, red acouchi, jaguarundi, and  
495 Amazonian brown brocket. The only diurnal species that did not experience a negative  
496 impact from tourism related disturbance were the tayra, South American coati, and red-

497 rumped agouti. However, cathemeral species were also impacted: jaguar, puma and  
498 lowland tapir. Several mostly nocturnal species were indeed hardly impacted or even  
499 experienced a positive correlation with tourist disturbance: margay, ocelot, spotted paca  
500 and giant armadillo.

501

502 Jaguars are usually reported as being nocturnal over most of their range [66-70]. Only in  
503 the relatively open wetland habitat of the Pantanal (Brazil), jaguars are reported as mostly  
504 or more diurnal [71, 72]. In the undisturbed area of Brownsberg, the Jaguar is more  
505 diurnal (59%) than nocturnal (31%). The central and southern parts of the plateau and  
506 slopes of Brownsberg Nature Park are considered to be relatively pristine among tropical  
507 rainforest areas in the world. It is therefore assumed that this observed activity pattern of  
508 the jaguar also resonates with their original activity patterns in rainforest habitat in other  
509 parts of the jaguar's range before it was impacted by human disturbance. In the  
510 undisturbed area of Brownsberg, the Puma is also cathemeral (41% diurnal, 45%  
511 nocturnal).

512

513 Human activities in protected areas increase the chance of encounters with large  
514 carnivores and this may harm the survival of sensitive species [73]. Disturbing predators  
515 during hunting or feeding may influence the effectiveness of their predation efforts and  
516 thereby impacting predator survival [74]. Large mammals in particular act as keystone  
517 species that can maintain diversity and balance within habitats and are therefore used as  
518 indicator species for the health of certain ecosystems [75]. The jaguar (*Panthera onca*) an  
519 important keystone species, fulfills a critical role in balancing the rainforest faunal



520 community, simply through its wide variety diet consisting of approximately 85 species  
521 of animals [76]. Imbalance in the mammal community can thus have varying impacts on  
522 the forest ecosystem through complex cascading effects of predator-prey and consumer-  
523 plant dynamics [77, 78]. There are many examples of the effects of partial defaunation on  
524 ecosystems, whereby remaining species may [79] or may not [80, 81] be able to fill in the  
525 functional gaps created by defaunation. There is even evidence that the plant community  
526 may decrease in diversity [82].

527 In-depth research and prolonged monitoring are required to evaluate if cascading impacts  
528 have already changed the rainforest ecosystem where most tourist activities have  
529 occurred in BNP.

530

531 When ecotourism management is done correctly, this practice can be beneficial for both  
532 humans as well as for wildlife communities. Researchers [83] in the Lapa Rios Ecological  
533 Natural Reserve in Costa Rica have argued that ecotourism has benefitted the wildlife  
534 community in this area, by acting as a “human shield” and deterring negative practices  
535 like gold mining, logging, and hunting. The same may very well be evident for  
536 Brownsberg Nature Park, where miners, loggers, and hunters seemed to mostly limit their  
537 activities to the foot and lower slopes of the mountain, where hardly any tourist trails  
538 exist. There have been observations of miners attempting to terminate existing trails (by  
539 intentionally creating forest fires) to Witi Creek to dissuade tourists from visiting and  
540 creating for themselves release of being caught in their illegal activities. Another example  
541 was after the park was closed at the onset of the COVID-19 crisis in 2020, during this  
542 time an increased number of miners/hunters was seen in the park (unpublished data).

543

544 Considering the negative impacts of hikers and traffic on the mammal community,  
545 especially at certain busy sites, managing authorities might consider applying measures to  
546 reduce these impacts. Traffic has had the most impact on the road coming up the  
547 mountain and continuing to the lodging facilities, while hikers had the most impact on the  
548 trails going to the nearest waterfalls (Leo/Irene Falls) and viewpoint (Mazaroni Top).

549 Based on the evaluation of the extent and magnitude of tourist presence in the different  
550 areas, the following management measures can be proposed to minimize the pressure on  
551 wildlife: 1) limiting the total number of tourists to the park per visitation; 2) diverting  
552 tourists as much as possible to other trails; 3) limiting access to the park for private  
553 vehicles; 4) limiting the access to the park for vehicles beyond the reception of the park;  
554 5. Creating activities at the lodges to divert pressure from the trails (e.g. educational  
555 activities, cultural performances, etc.). Measures 1 and 3 may be quite difficult to  
556 implement and may have serious financial consequences for the managing authority  
557 STINASU. Diverting tourists to other trails to relieve pressure on the busiest ones  
558 (measure 2) can also have dubious effects since this will only increase the area that will  
559 ultimately be exposed. Measure 4, limiting access for vehicles beyond the reception,  
560 could easily be implemented, and would drastically diminish disturbance at the southern  
561 part of the park. However, this would not differ for the busiest areas. Measure 5 could  
562 possibly relieve a little bit of pressure on the most impacted trails.

563

564

## 565 **Acknowledgements**

566

567 We like to thank all persons that on occasion helped us in the field: Geeta Thakoerdien,  
568 Usha Satnarain, Niradj Hanoeman, Mercedes Hardjoprajitno, Cindyrella Kasanpawiro,  
569 Richero Kasanwidjojo, Carlo Koorndijk, Gunovaino Marjanom, Devina Bissumbhar,  
570 Naomi Reussien, Ashvin Sewsahai, Artie Sewdien and Sergio Doelasan.

571 We further thank the (former) coordinator of the VLIR MSc Sustainable Management of  
572 Natural Resources, Riad Nurmohamed, and the VLIR Secretariat for providing  
573 administrative support. And lastly we thank STINASU for granting permission to carry  
574 out this research project at the Brownsberg Nature Park.

575

576

577

## 578 **References**

579

- 580 1. Stem CJ, Lassoie JP, Lee DR, Deshler DJ. How 'eco' is ecotourism? A  
581 comparative case study of ecotourism in Costa Rica. *J. Sustain. Tour.* 2003; 11(4):  
582 322-347.
- 583 2. Krüger O. The role of ecotourism in conservation: panacea or Pandora's  
584 box? *Biodivers. Conserv.* 2005; 14(3): 579-600.
- 585 3. Aylward B, Allen K, Echeverría J, Tosi J. Sustainable ecotourism in Costa Rica:  
586 the Monteverde cloud forest preserve. *Biodivers. Conserv.* 1996; 5(3): 315-343.
- 587 4. Tablado Z, D'Amico M. Impacts of terrestrial animal tourism. In: Blumstein DT, et

- 588 al., editors. *Ecotourism's Promise and Peril*. Springer International Publishing;  
589 2017; pp. 97-115.
- 590 5. Fitzgerald KA, De Dijn BP, Mitro S. Brownsberg Nature Park ecological research  
591 and monitoring program 2001-2006. Paramaribo: STINASU; 2002.
- 592 6. Cunha AA. Negative effects of tourism in a Brazilian Atlantic forest National Park. *J.*  
593 *Nat. Conserv.* 2010; 18(4): 291-295.
- 594 7. TIES (The International Ecotourism Society), 2015. Available from:  
595 <http://www.ecotourism.org/>.
- 596 8. Place S. Ecotourism for sustainable development: Oxymoron or plausible  
597 strategy? *GeoJournal* 1995; 35(2): 161-173.
- 598 9. Bookbinder MP, Dinerstein E, Rijal A, Cauley H, Rajouria A. Ecotourism's  
599 support of biodiversity conservation. *Conserv. Biol.* 1998; 12(6): 1399- 1404.
- 600 10. Grossberg R, Treves A, & Naughton-Treves L. The incidental ecotourist: measuring  
601 visitor impacts on endangered howler monkeys at a Belizean archaeological  
602 site. *Environ. Conserv.* 2003; 30(01): 40-51.
- 603 11. Zambrano AMA, Broadbent EN, Durham WH. Social and environmental effects of  
604 ecotourism in the Osa Peninsula of Costa Rica: the Lapa Rios case. *J. Ecotourism*  
605 2010; 9(1): 62-83.
- 606 12. Geffroy B, Samia DS, Bessa E, Blumstein DT. How Nature-Based Tourism Might  
607 Increase Prey Vulnerability to Predators. *Trends Ecol. Evol.* 2015; 30(12): 755-  
608 765.
- 609 13. Hiding LA. Measuring the impacts of ecotourism on animal populations: A case  
610 study of Tikal National Park, Guatemala. *Yale For. Environ. Bull.* 1996; 99: 49-

- 611 59.
- 612 14. Sijlbing HA. Does sustainable tourism offer solutions for the protection of the  
613 Amazon rainforest in Suriname? *Worldw. Hosp. Tour. Themes* 2010.
- 614 15. SBB. Forest cover monitoring in Suriname using remote sensing techniques for  
615 the period 2000-2015. Paramaribo: SBB; 2017.
- 616 16. UNEP-WCMC. Protected Area Profile for Suriname from the World Database of  
617 Protected Areas, January 2021. Available  
618 at: <https://www.protectedplanet.net/country/SUR>
- 619 17. Arets E, van der Meer PJ, van den Brink NW, Tjon K, Atmopawiro VP, Ouboter  
620 PE. Assessment of the impacts of gold mining on soil and vegetation in  
621 Brownsberg Nature Park, Suriname. *Alterra* 2006; 1359: 1-26.
- 622 18. Reichart HA. Brownsberg Nature Park management plan 1991-1995, 2nd ed.  
623 Paramaribo: STINASU; 1997.
- 624 19. De Dijn BP, Molgo IE, Norconk MA, Gregory LT, O'Shea B, Marty C, et al.  
625 The biodiversity of the Brownsberg. In: Alonso LE, Mol JH, editors. *A Rapid  
626 Biological Assessment of the Lely and Nassau Plateaus, Suriname (with additional  
627 information on the Brownsberg Plateau)*. *RAP Bull. Biol. Assessm.* 2007; 43: 135-  
628 155.
- 629 20. Norconk MA, Raghanti MA, Martin SK, Grafton BW, Gregory LT, De Dijn BP.  
630 *Primates of Brownsberg Natuurpark, Suriname, with particular attention to the  
631 pitheciins.* *Neotrop. Primates* 2003; 11(2): 94-100.
- 632 21. Lim BK, Engstrom MD, Genoways HH, Catzeflis FM, Fitzgerald KA, Peters SL, et  
633 al. Results of the Alcoa Foundation-Suriname expeditions. XIV. Mammals of

- 634 Brownsberg Nature Park, Suriname. *Ann. Carnegie Mus.* 2005; 74(4): 225-274.
- 635 22. Versteeg AH. Suriname before Columbus. Paramaribo: Stichting Surinaams  
636 Museum; 2003.
- 637 23. Hoop CU. Verdrongen land, verdwenen dorpen: de transmigratie van Saramaccaners  
638 in Suriname 1958-1964. *Bewustzijn* 1991, Alkmaar.
- 639 24. Ouboter PE, Landburg G, Quik J, Mol J, v.d. Lugt F. Mercury Levels in Pristine  
640 and Gold Mining Impacted Aquatic Ecosystems of Suriname, South America.  
641 *Ambio* 2012; 41(8): 873-882.
- 642 25. Emmons L, Feer F. Neotropical rainforest mammals: A Field Guide. Chicago:  
643 University of Chicago Press; 1997.
- 644 26. IUCN. The IUCN Red List of Threatened Species. Version 2020-3. Available at:  
645 <https://www.iucnredlist.org>.
- 646 27. Simpson EH. Measurement of diversity. *Nature* 1949; 163: 688.
- 647 28. Magurran AF. *Measuring Biological Diversity*. Malden: Blackwell Publ.; 2004.
- 648 29. Carbone C, Christie S, Coulson T, Franklin N, Ginsberg J, Griffiths M, et al. The  
649 use of photographic rates to estimate densities of tigers and other cryptic mammals.  
650 *Anim. Conserv.* 2001; 4: 75–79.
- 651 30. O'Brien TG, Kinnaird MF, Wibisono HT. Crouching tigers, hidden prey: Sumatran  
652 tiger and prey populations in a tropical forest landscape. *Anim. Conserv.*  
653 2003; 6: 131–139.
- 654 31. Clarke KR. Non-parametric multivariate analyses of changes in community  
655 structure. *Austral. Ecol.* 1993; 18: 117-143.
- 656 32. R Core Team. *R: A language and environment for statistical computing*. Vienna: R

- 657 Foundation for Statistical Computing; 2018. Available at: [https://www.R-](https://www.R-project.org/)  
658 [project.org/](https://www.R-project.org/).
- 659 33. Ridout MS, Linkie M. Estimating overlap of daily activity patterns from camera  
660 trap data. *J. Agric. Biol. Environ. Stat.* 2009; 14(3): 322-337.
- 661 34. Meredith M, Ridout M. Overview of the overlap package. *R. Proj.* 2018: 1-9.
- 662 35. Agostinelli C, Lund U. R package circular: Circular Statistics (version 0.4–93), 2017.  
663 Available at: <https://r-forge.r-project.org/projects/circular/>.
- 664 36. Thieurmel B, Elmarhraoui A. Suncalc: Compute sun position, sunlight phases,  
665 moon position and lunar phase. *R package version 0.5.0.*, 2019. Available at:  
666 <https://CRAN.R-project.org/package=suncalc>.
- 667 37. Ahumada JA, Silva CEF, Gajapersad K, Hallam C, Hurtado J, Martin E, et al.  
668 Community structure and diversity of tropical forest mammals: data from a global  
669 camera trap network. *Philos. Trans. R. Soc. Lond. B Biol. Sci.* 2011; 366: 2703-  
670 2711.
- 671 38. Ouboter PE, Kadosoe VS. Three years of continuous monitoring of the large  
672 terrestrial mammals of Brownsberg Nature Park, Suriname. *Acad. J. Sur.* 2016; 7:  
673 643-660.
- 674 39. Maffei L, Cuéllar E, Noss A. Uso de Trampas-Cámara para la Evaluación de  
675 Mamíferos en el Ecotono Chaco-Chiquitanía. *Rev. Bol. Ecol.* 2002; 11: 55–65.
- 676 40. Srbek-Araujo AC, Chiarello AG. Is camera-trapping an efficient method for  
677 surveying mammals in Neotropical Forests? A case study in south-eastern Brazil.  
678 *J. Trop. Ecol.* 2005; 21: 121–125.
- 679 41. de Souza Martis S, Sanderson JG, de Sousa e Silva-Junior J.

- 680 Monitoring mammals in the Caxiuanu National Forest, Brazil  
681 - First results from the Tropical Ecology, Assessment and Monitoring  
682 (TEAM) program. *Biodiv. Conserv.* 2007; 16(4): 857–870.
- 683 42. González-Maya JF. Densidad, uso de hábitat y presas del Jaguar (*Panthera onca*) y el  
684 conflicto con humanos en la región de Talamanca, Costa Rica. Tesis de Mestría,  
685 Turrialba, Centro Agronómico Tropical de Investigación y Enseñanza, Costa Rica.  
686 2007.
- 687 43. Ouboter PE, Hardjoprajitno M, Kadosoe V, Kasanpawiro C, Kishna K,  
688 Soetotaroeno A. A comparison of terrestrial large-mammal communities between  
689 Brownsberg, Raleighvallen and Coesewijne, Suriname. *Acad. J. Sur.* 2011; 2: 176 –  
690 181.
- 691 44. Isasi-Catalá E. Estudio del estado de conservación del Jaguar (*Panthera onca*) en  
692 el Parque Nacional Guatopo. Tesis Doctoral, Universidad Simón Bolívar, Sartenejas,  
693 Venezuela. 2012.
- 694 45. Jax E, Marín S, Rodríguez-Ferraro A, Isasi-Catalá E. Habitat use and relative  
695 abundance of the Spotted Paca *Cuniculus paca* (Linnaeus, 1766) (Rodentia:  
696 Cuniculidae) and the Red-rumped Agouti *Dasyprocta leporina* (Linnaeus,  
697 1758)(Rodentia: Dasyproctidae) in Guatopo National Park, Venezuela. *J. Threat.*  
698 *Taxa* 2015; 7(1): 6739-6749.
- 699 46. Kelly MJ, Noss AJ, Di Bitetti MS, Maffei L, Arispe RL, Paviolo A, et al. Estimating  
700 puma densities from camera trapping across three study sites: Bolivia, Argentina,  
701 and Belize. *J. Mammal.* 2008; 89(2): 408-418.
- 702 47. Soria-Díaz L, Monroy-Vilchis O, Rodríguez-Soto C, Zarco-González MM, Urios V.



- 703 (2010). Variation of abundance and density of *Puma concolor* in zones of high  
704 and low concentration of camera traps in Central Mexico. *Anim. Biol.*  
705 2010; 60(4): 361-371.
- 706 48. Blake JG, Mosquera D, Loiselle BA, Swing K, Guerra J, Romo, D. Temporal  
707 activity patterns of terrestrial mammals in lowland rainforest of eastern  
708 Ecuador. *Ecotropica* 2012; 18: 137-146.
- 709 49. Maffei L, Noss AJ, Silver SC, Kelly MJ. Abundance/Density Case Study: Jaguars in  
710 the Americas. In: O'Connell AF, Nichols JD, Karanth KU, editors. *Camera Traps in*  
711 *Animal Ecology. Methods and Analyses*. Tokyo: Springer; 2011. pp. 119-144.
- 712 50. Kadosoe VS. Long-term monitoring of the population status of the Jaguar  
713 (*Panthera onca*) at Brownsberg Nature Park, Suriname - following the royal  
714 bloodline of an apex predator. MSc thesis. Institute for Graduate Studies and  
715 Research, Anton de Kom University of Suriname, Paramaribo. 2020.
- 716 51. Rowcliffe JM, Carbone C. Surveys using camera traps: are we looking to a  
717 brighter future? *Anim. Conserv.* 2008; 11: 185–186.
- 718 52. Griffiths M, Van Schaik CP. The impact of human traffic on the abundance and  
719 activity periods of Sumatran rain forest wildlife. *Conserv. Biol.* 1993; 7: 623–626.
- 720 53. Blake JG, Mosquera D, Loiselle BA, Romo D, Swing K. Effects of human traffic on  
721 use of trails by mammals in lowland forest of eastern Ecuador. *Neotrop. Biodivers.*  
722 2017; 3(1): 57-64.
- 723 54. de Oliveira TG, Pereira JA. Intraguild predation and interspecific killing as  
724 structuring forces of Carnivoran communities in South America. *J. Mamm. Evol.*  
725 2014; 21(4): 427-436.

- 726 55. González-Maya JF, Navarro-Arquez E, Schipper J. Ocelots as prey items of  
727 jaguars: a case from Talamanca, Costa Rica. *Rev. Biol. Trop.* 2010; 45: 1223- 1229.
- 728 56. Muhly TB, Semeniuk C, Massolo A, Hickman L, Musiani M. Human activity helps  
729 prey win the predator-prey space race. *PLoS One* 2011, 6(3).
- 730 57. Rocha-Mendes F, Mikich SB, Quadros J, Pedro WA. Feeding ecology of carnivores  
731 (Mammalia, Carnivora) in Atlantic forest remnants, southern Brazil. *Biota Neotrop.*  
732 2010; 10(4): 21-30.
- 733 58. Nagy-Reis MB, Iwakami VH, Estevo CA, Setz EZ. Temporal and dietary  
734 segregation in a neotropical small-felid assemblage and its relation to prey  
735 activity. *Mamm. Biol.* 2019; 95(1): 1-8.
- 736 59. Aliaga-Rossel E, Moreno RS, Kays RW, Giacalone J. Ocelot (*Leopardus pardalis*)  
737 Predation on Agouti (*Dasyprocta punctata*). *Biotropica* 2006; 38(5): 691-694.
- 738 60. Emsens WJ, Hirsch BT, Kays R, Jansen PA. Prey refuges as predator hotspots:  
739 ocelot (*Leopardus pardalis*) attraction to agouti (*Dasyprocta punctata*) dens. *Acta*  
740 *Theriol. (Warsz)* 2014; 59(2): 257-262.
- 741 61. Moreno RS, Kays RW, Samudio R. Competitive release in diets of ocelot  
742 (*Leopardus pardalis*) and puma (*Puma concolor*) after jaguar (*Panthera onca*)  
743 decline. *J. Mammal.* 2006; 87(4): 808-816.
- 744 62. Roe D, Leader-Williams N, Dalal-Clayton DB. Take only photographs, leave only  
745 footprints: the environmental impacts of wildlife tourism. London: The  
746 International Institute for Environment and Development; 1997.
- 747 63. Gaynor KM, Hojnowski CE, Carter NH, Brashares JS. The influence of human  
748 disturbance on wildlife nocturnality. *Science* 2018; 360: 1232-1235.

- 749 64. Ngoprasert D, Lynam AJ, Gale GA. Effects of temporary closure of a national  
750 park on leopard movement and behaviour in tropical Asia. *Mamm. Biol.* 2017; 82:  
751 65–73.
- 752 65. Paviolo A, Di Blanco YE, De Angelo CD, Di Bitetti MS. Protection Affects the  
753 Abundance and Activity Patterns of Pumas in the Atlantic Forest. *J. Mammal.* 2009;  
754 90(4): 926-934.
- 755 66. Emmons LH. Comparative feeding ecology of felids in a neotropical rainforest.  
756 *Behav. Ecol. Sociobiol.* 1987; 20: 271-283.
- 757 67. Núñez R, Miller B, Lindzey F. Ecología del jaguar en la reserva de la Biosfera  
758 Chamela-Cuixmala, Jalisco, México. In: Medellín RA, et al., editors. *El Jaguar en el*  
759 *Nuevo Milenio. Una evaluación de su estado, detección de prioridades y*  
760 *recomendaciones para la conservación de los jaguars en América.* Mexico City:  
761 Universidad Nacional Autónoma de México and Wildlife Conservation Society;  
762 2002. pp.107–126.
- 763 68. Scognamillo D, Esperanza Maxit I, Sunquist M, Polisar J. Coexistence of jaguar  
764 (*Panthera onca*) and puma (*Puma concolor*) in a mosaic landscape in the  
765 Venezuelan llanos. *J. Zool.* 2003; 259: 269–279.
- 766 69. Harmsen BJ, Foster RJ, Silver S, Ostro L, Doncaster CP. Differential Use of Trails  
767 by Forest Mammals and the Implications for Camera - Trap Studies: A Case Study  
768 from Belize. *Biotropica* 2010; 42(1): 126-133.
- 769 70. Astete S, Marinho-Filho J, Kajin M, Penido G, Zimbres B, Sollmann R, et al.  
770 Forced neighbours: Coexistence between jaguars and pumas in a harsh  
771 environment. *J. Arid. Environ.* 2017: 1-8,

- 772 <http://dx.doi.org/10.1016/j.jaridenv.2017.07.005>
- 773 71. Crawshaw Jr. PG, Quigley HB. Jaguar spacing, activity and habitat use in a  
774 seasonally flooded environment in Brazil. *J. Zool.* 1991; 223: 357–370.
- 775 72. Foster VC, Sarmiento P, Sollmann R, Tôrres N, Jácomo ATA, Negrões N, et al.  
776 Jaguar and Puma Activity Patterns and Predator-Prey Interactions in Four Brazilian  
777 Biomes. *Biotropica* 2013, 45(3), 373-379.
- 778 73. Woodroffe R. Predators and people: using human densities to interpret declines of  
779 large carnivores. *Anim. Conserv.* 2000; 3: 165–173.
- 780 74. Kerley LL, Goodrich JM, Miquelle DG, Smirnov EN, Quigley HB. Effects of roads  
781 and human disturbance on Amur tigers. *Conserv. Biol.* 2002; 16: 97–108.
- 782 75. Sinclair ARE. Mammal population regulation, keystone processes and ecosystem  
783 dynamics. *Philos. Trans. R. Soc. Lond. B Biol. Sci.* 2003; 358(1438): 1729-1740.
- 784 76. Seymour KL. *Panthera onca*. *Mammalian Species* 1989; 340: 1-9.
- 785 77. Terborgh J, Lopez, L., Nunez, P., Rao, M., Shahabuddin, G., Orihuela, G.,  
786 Riveros, M., Ascanio R, Adler GH, Lambert TD, Balbas L. (2001). Ecological  
787 meltdown in predator-free forest fragments. *Science* 2001; 294(5548): 1923-1926.
- 788 78. Estes JA, Terborgh J, Brashares JS, Power ME, Berger J, Bond WJ, et al. Trophic  
789 downgrading of planet Earth. *Science* 2011; 333(6040): 301-306.
- 790 79. Gutierrez BL, Almeyda Zambrano AM, Mulder G, Ols C, Dirzo R, Almeyda  
791 Zambrano SL, et al. No changes in seedling recruitment when terrestrial mammals  
792 are excluded in a partially defaunated Atlantic rainforest. *Biol. Conserv.* 2013; 163:  
793 107-114.
- 794 80. Galetti M, Bovendorp RS, Guevara R. Defaunation of large mammals leads to an

- 795        increase in seed predation in the Atlantic forests. *Glob. Ecol. Conserv.* 2015; 3:  
796        824-830.
- 797    81. Bogoni JA, Cherem JJ, Giehl ELH, Oliveira-Santos LG, de Castilho PV, Filho VP.  
798        et al. Landscape features lead to shifts in communities of medium-to large-bodied  
799        mammals in subtropical Atlantic Forest. *J. Mammal.* 2016; 97(3): 713-725.
- 800    82. Kurten EL. Cascading effects of contemporaneous defaunation on tropical forest  
801        communities. *Biol. Conserv.* 2013; 163: 22-32.
- 802    83. Villareal E, Sanchez Espinosa A, Quiros A, Stein TV, Lewis K, Broadbent EN.  
803        Ecotourism: the ‘human shield’ for wildlife conservation in the Osa Peninsula,  
804        Costa Rica. *Journal of Ecotourism* 2019: 1-20.



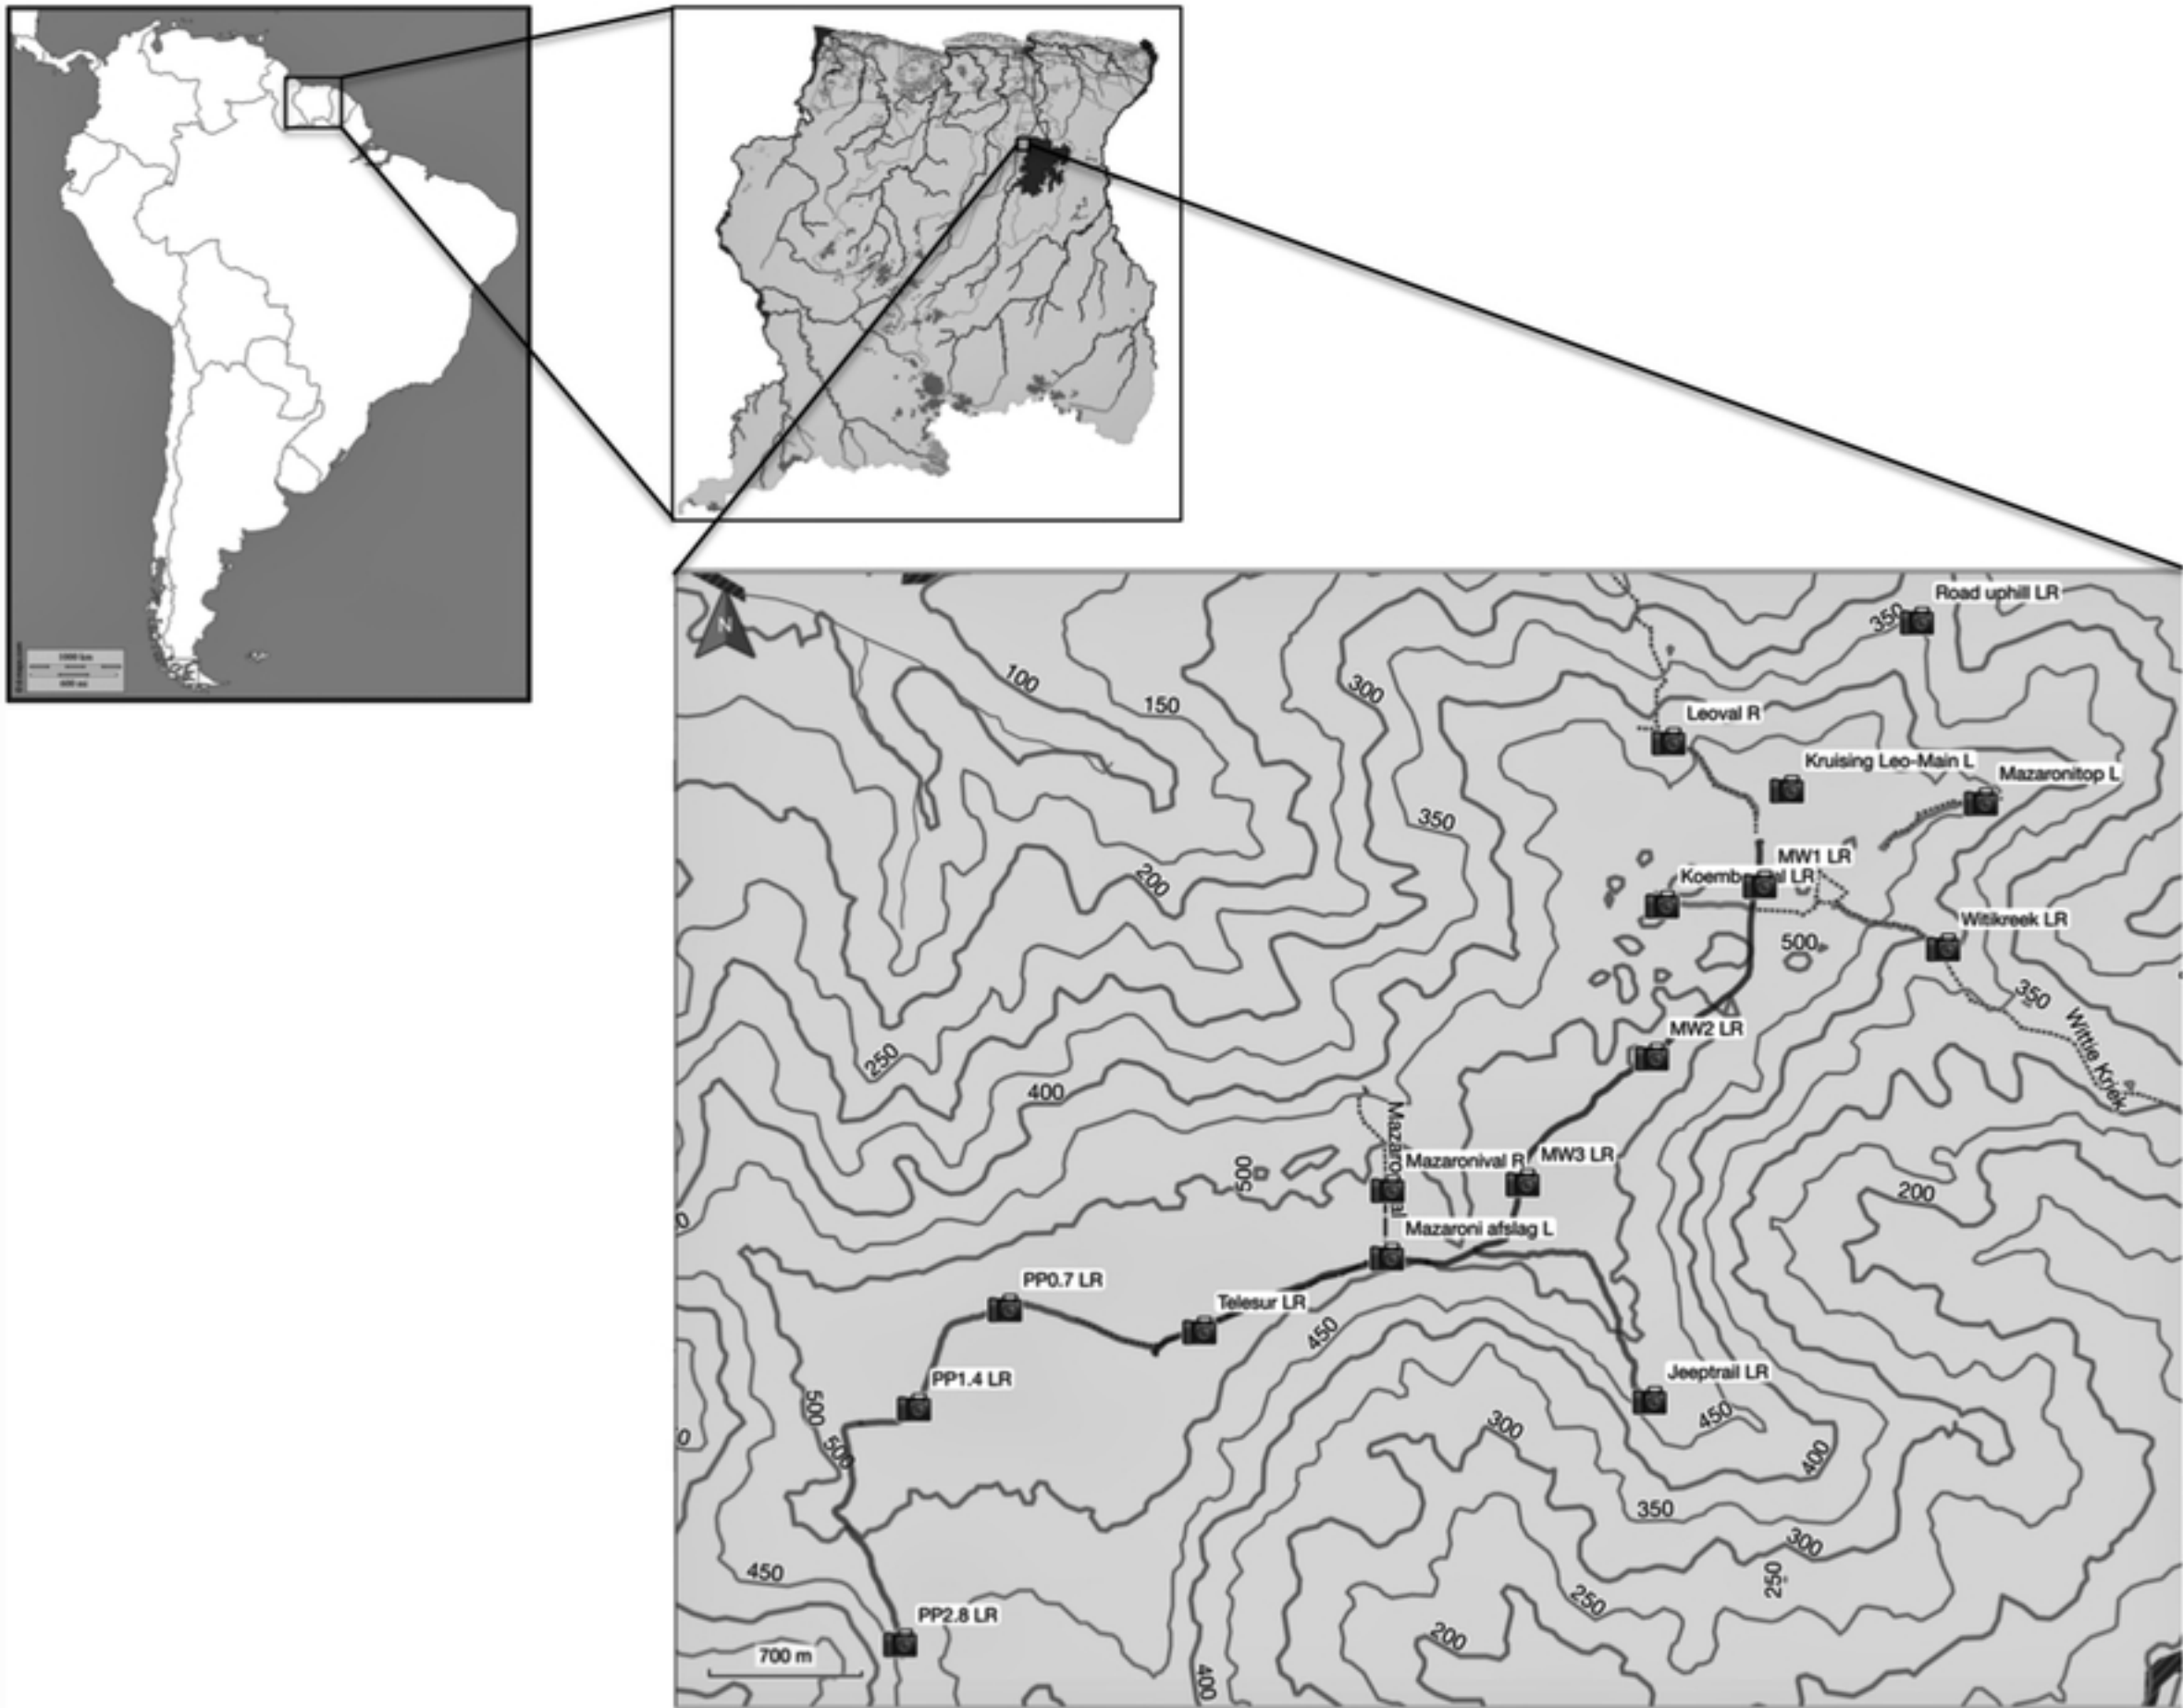

Figure

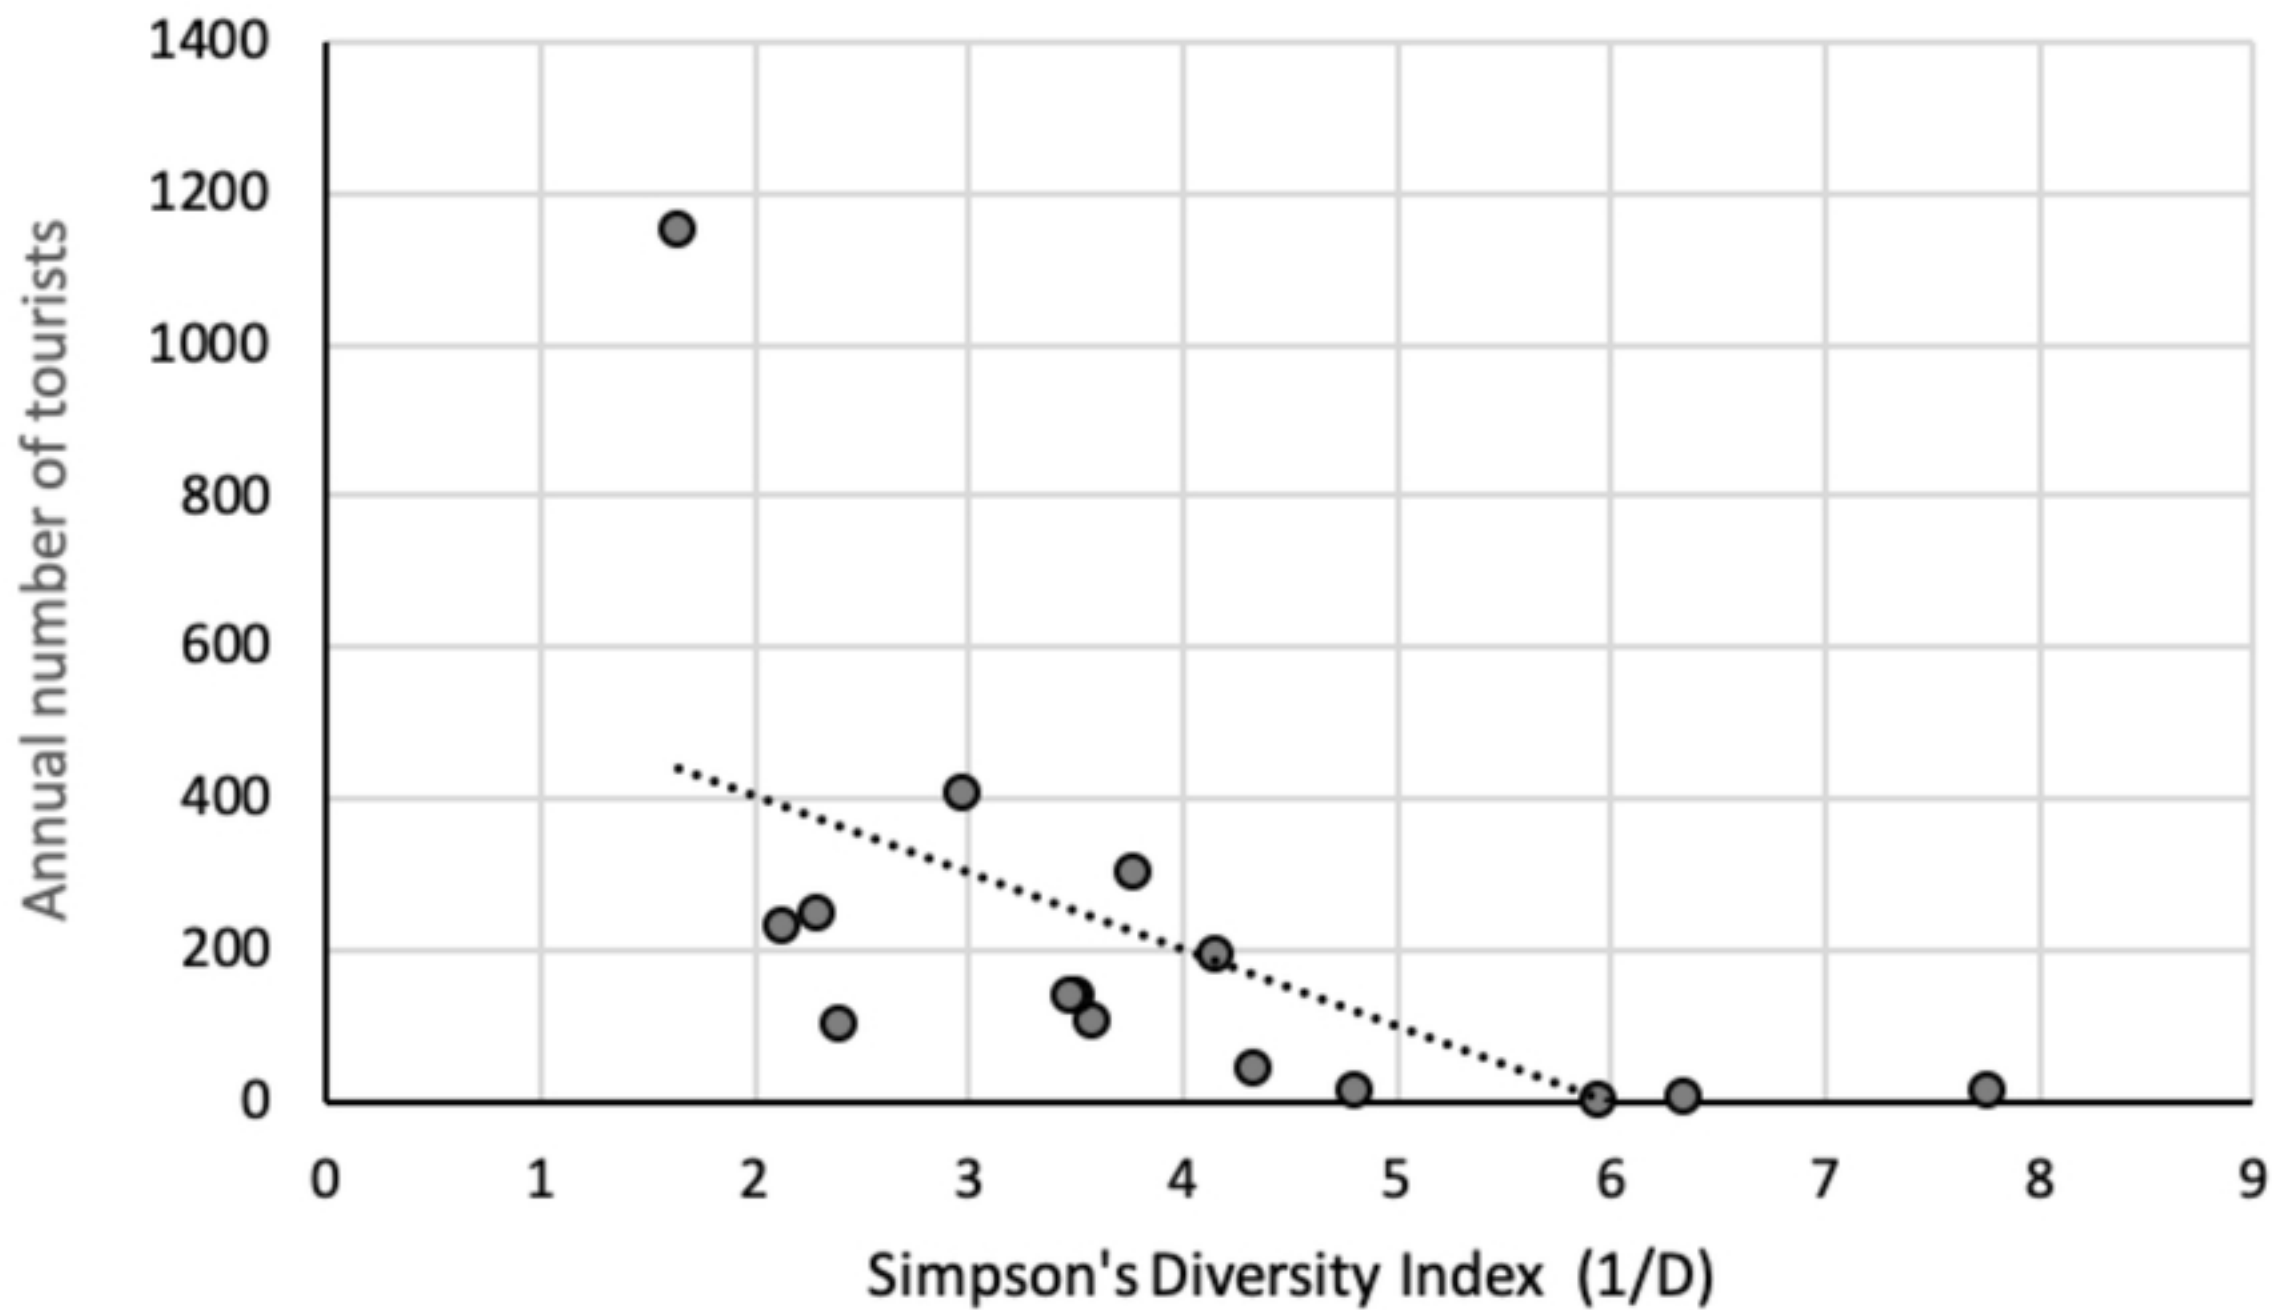

Figure



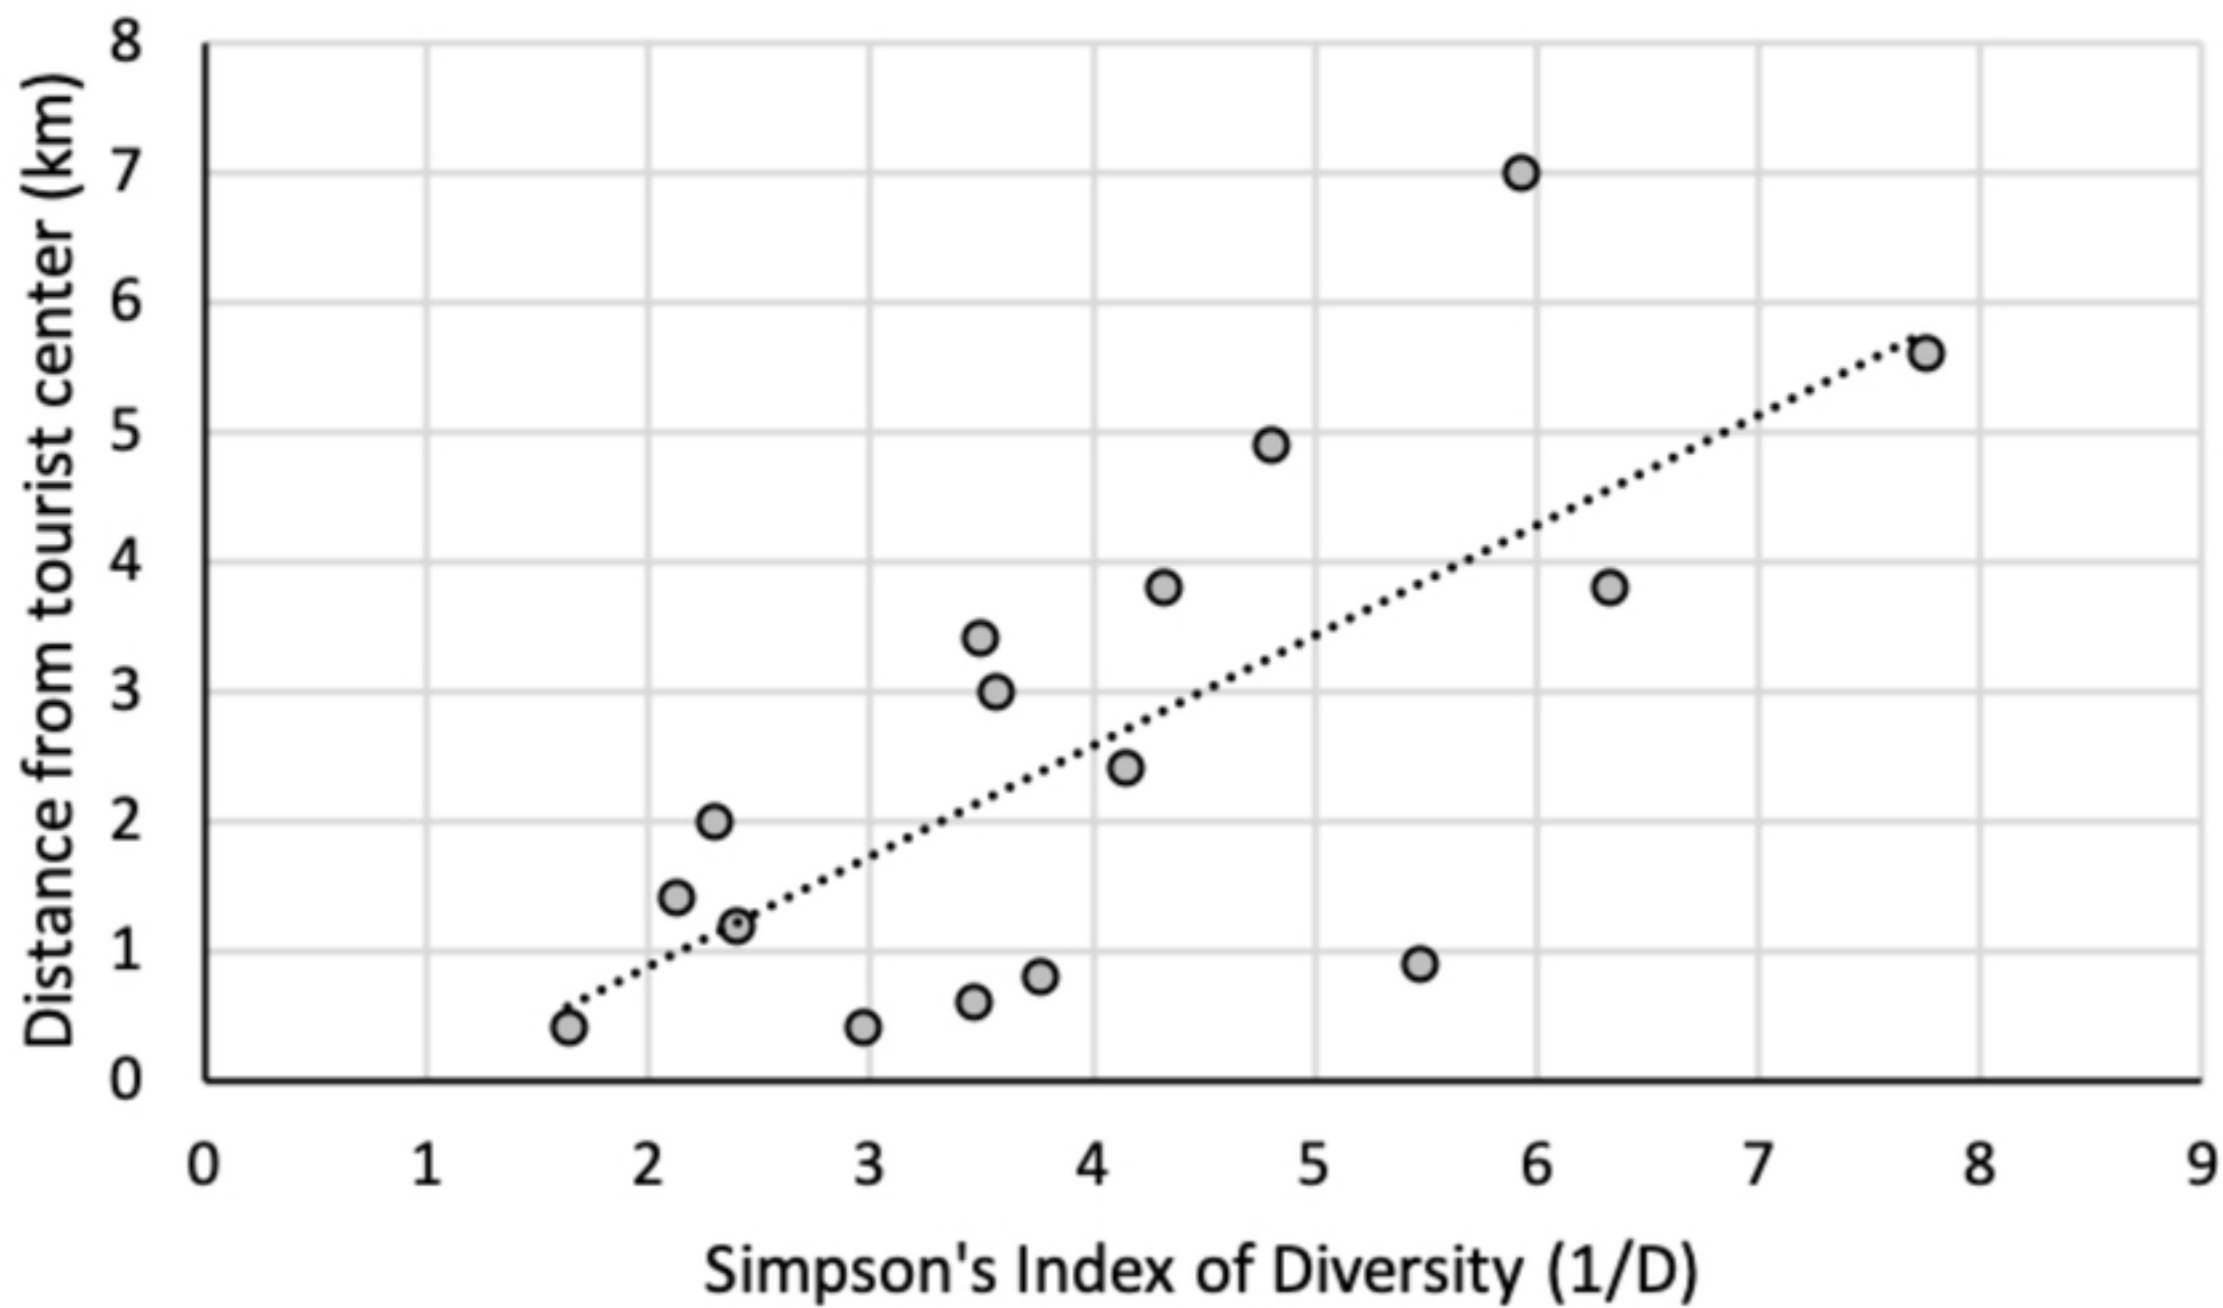

Figure

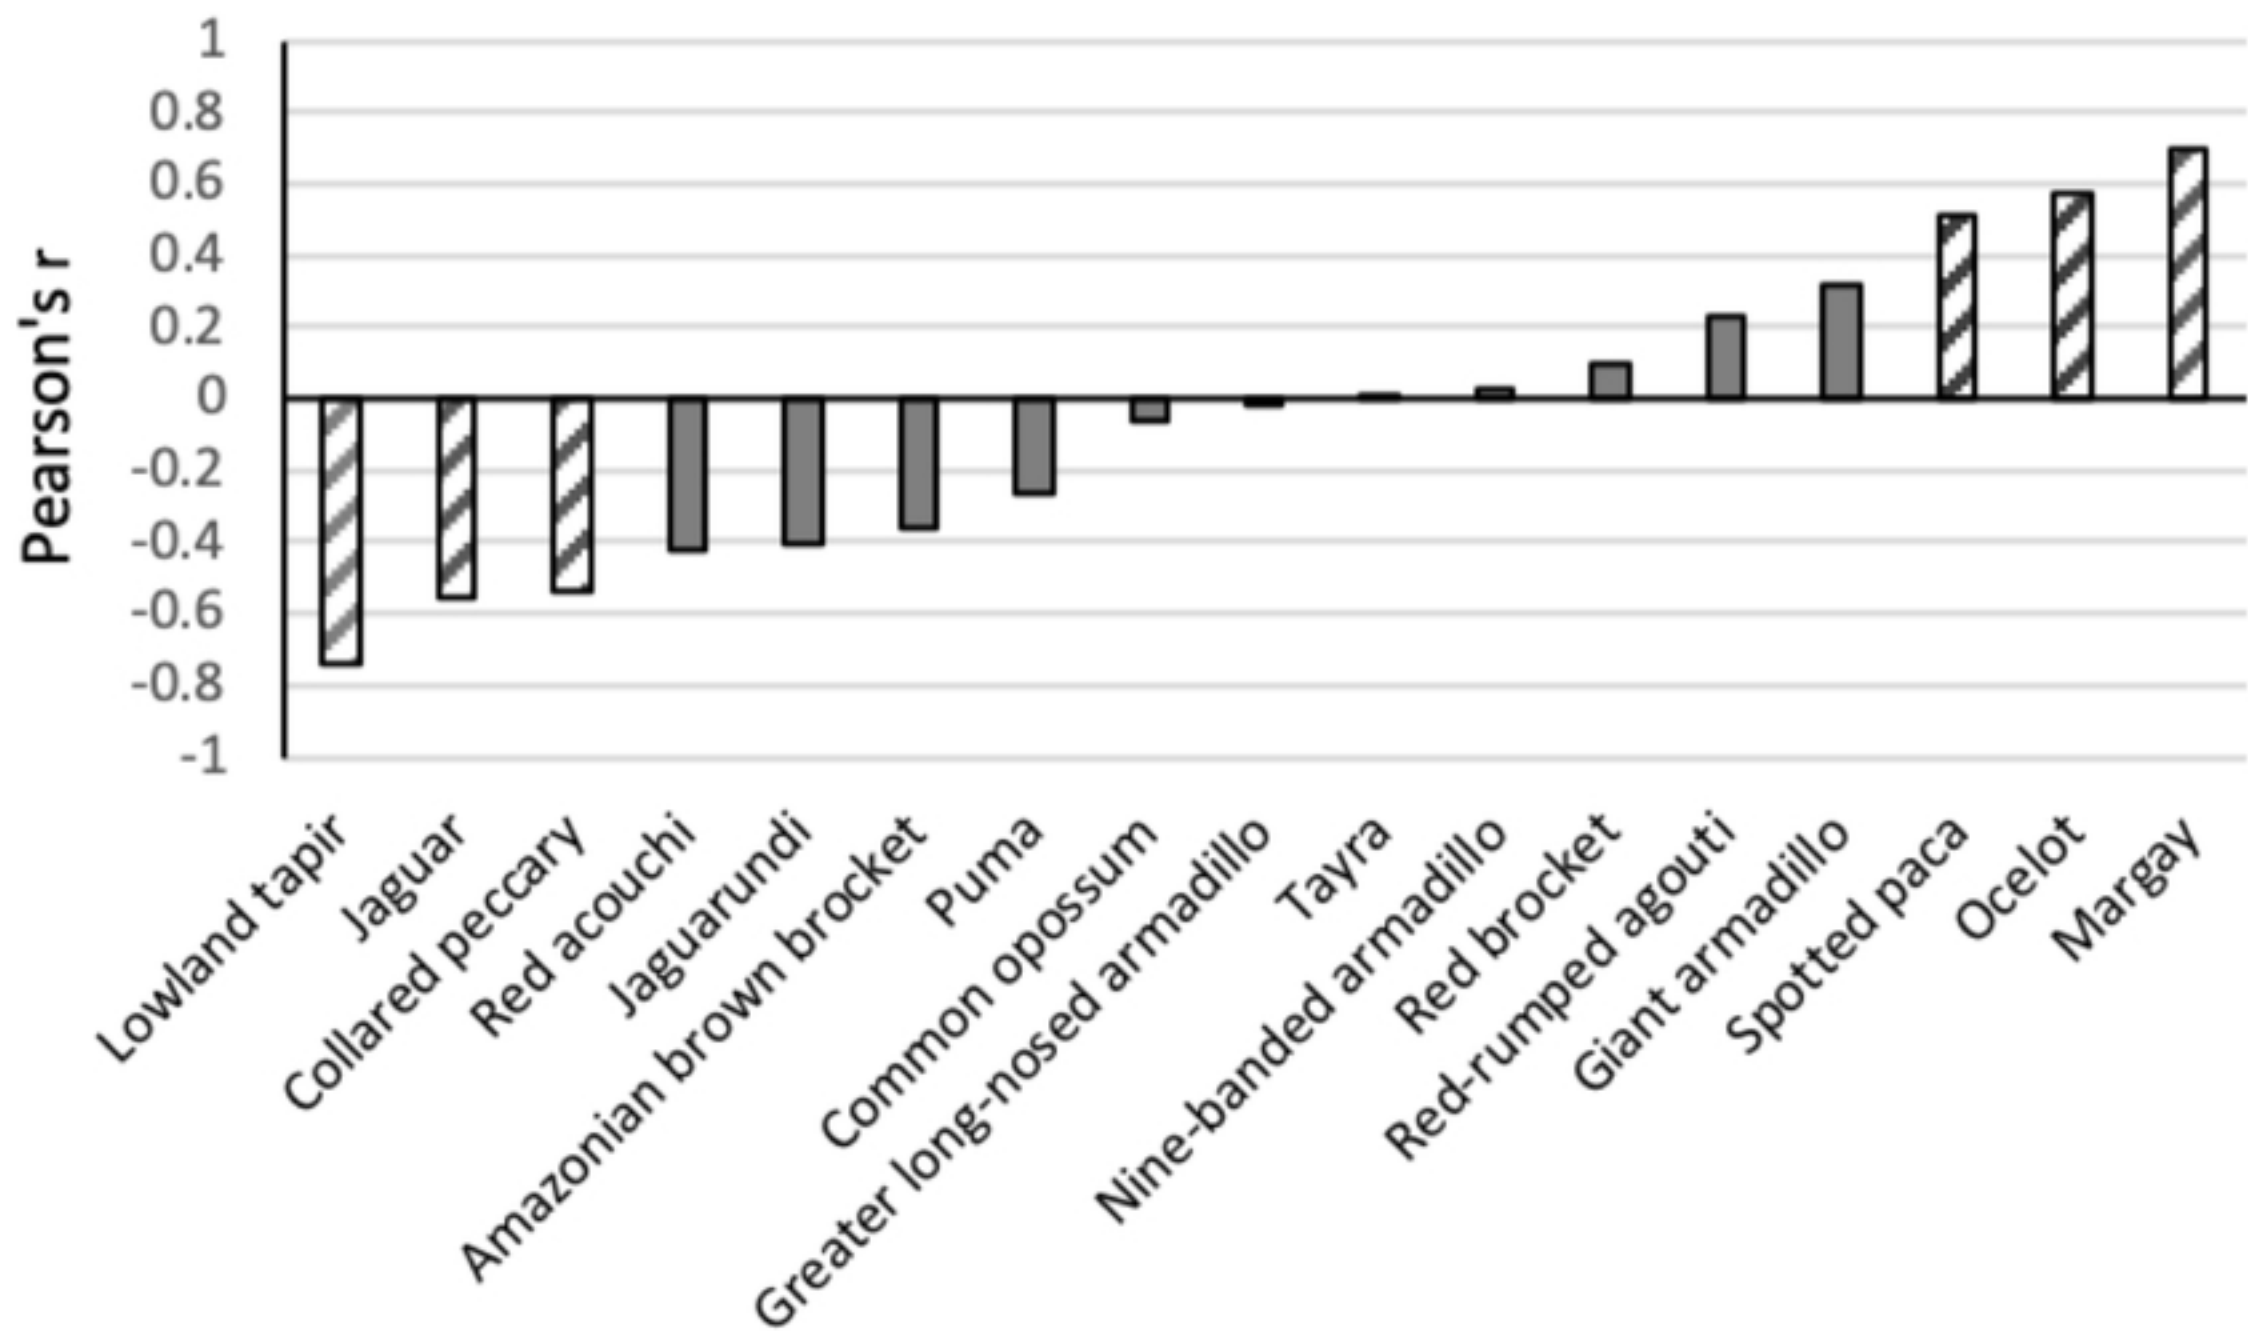

Figure

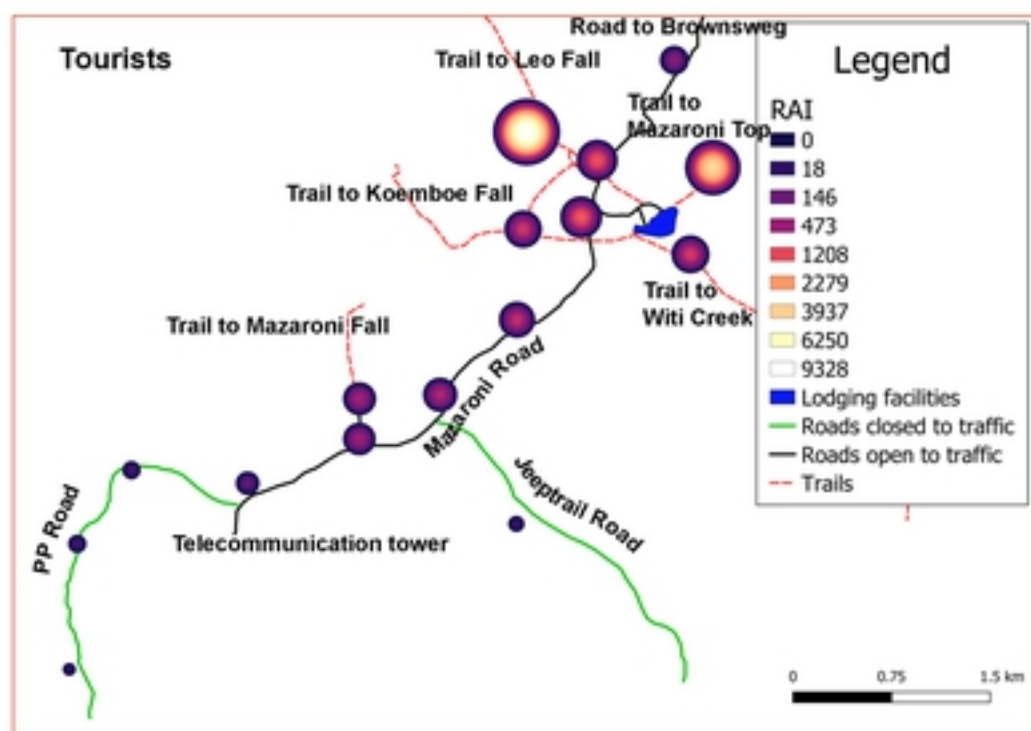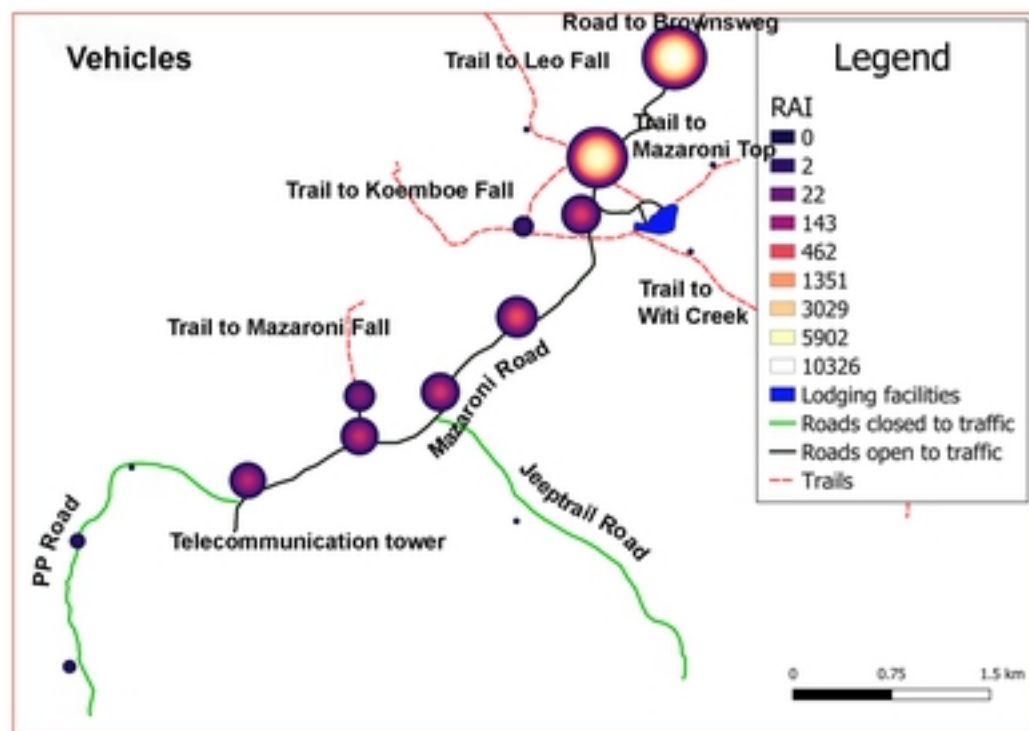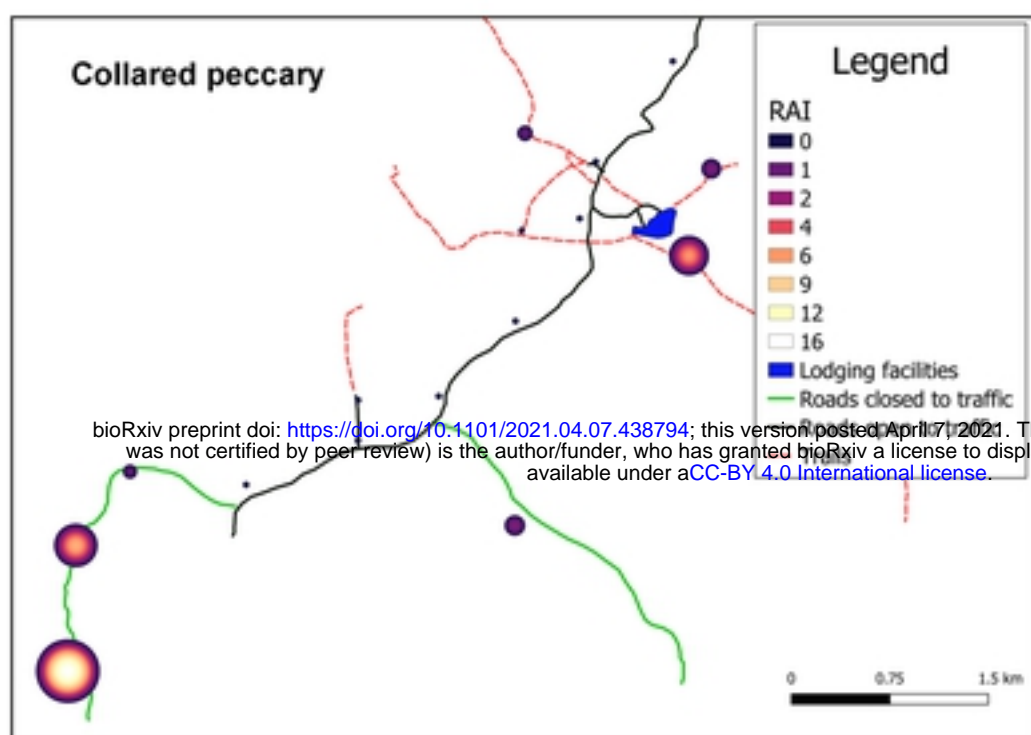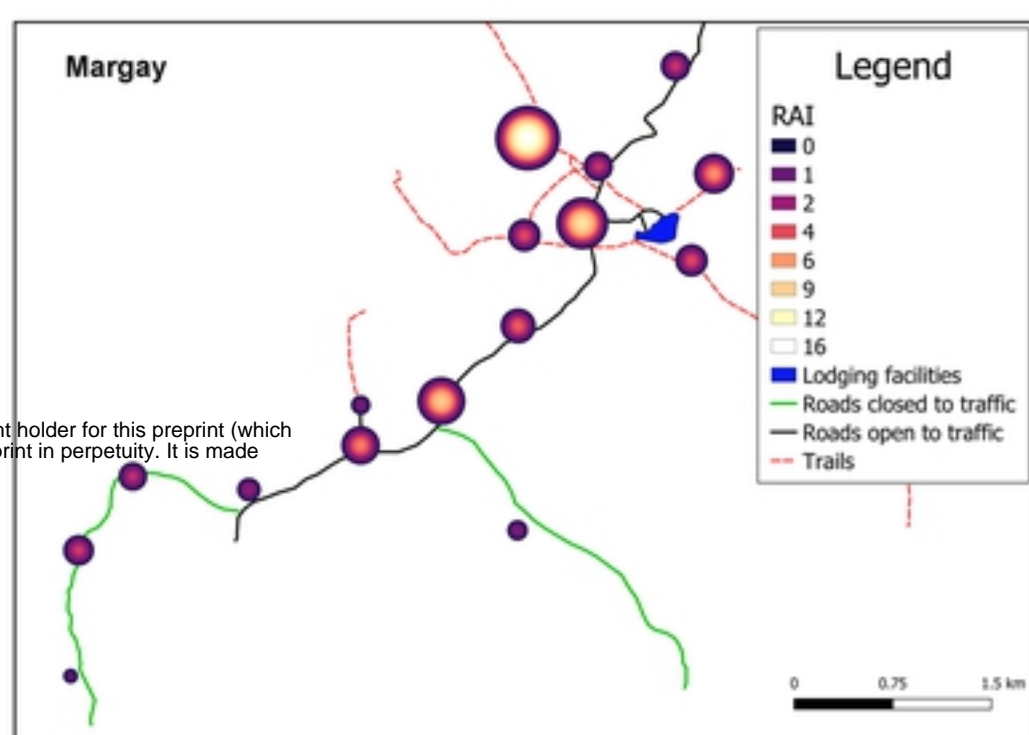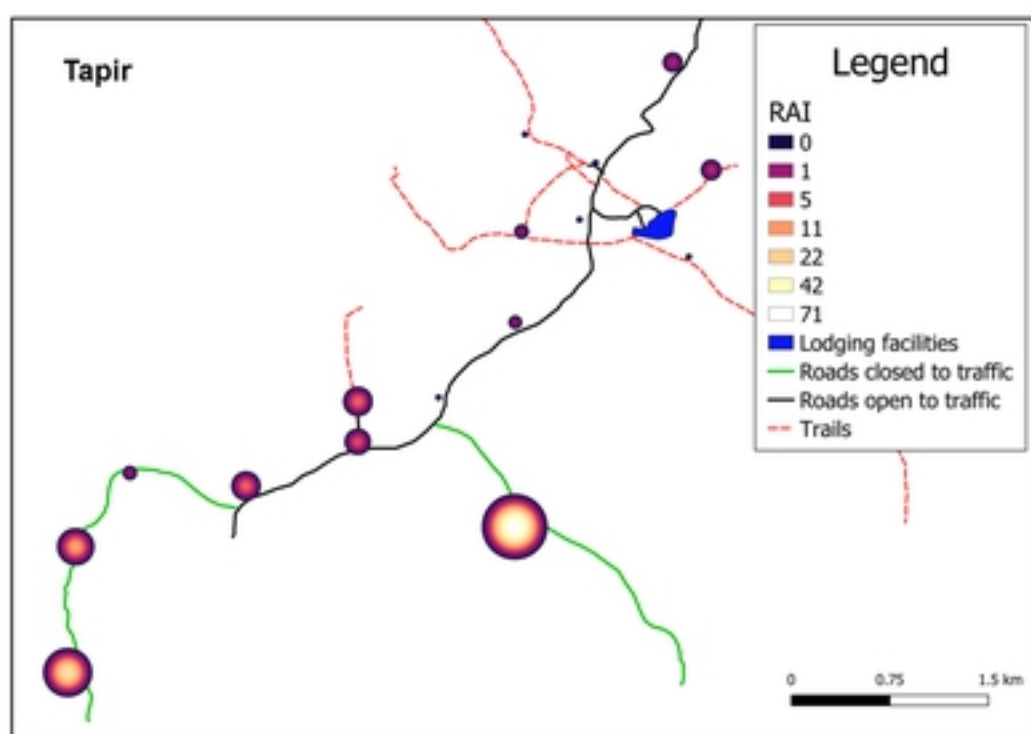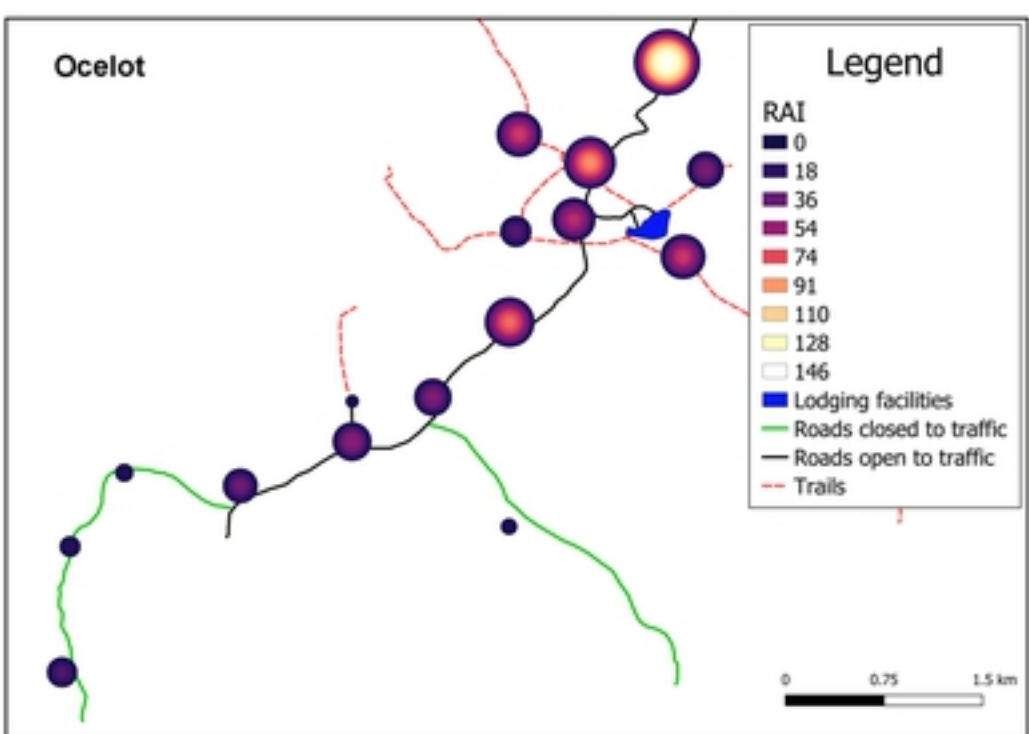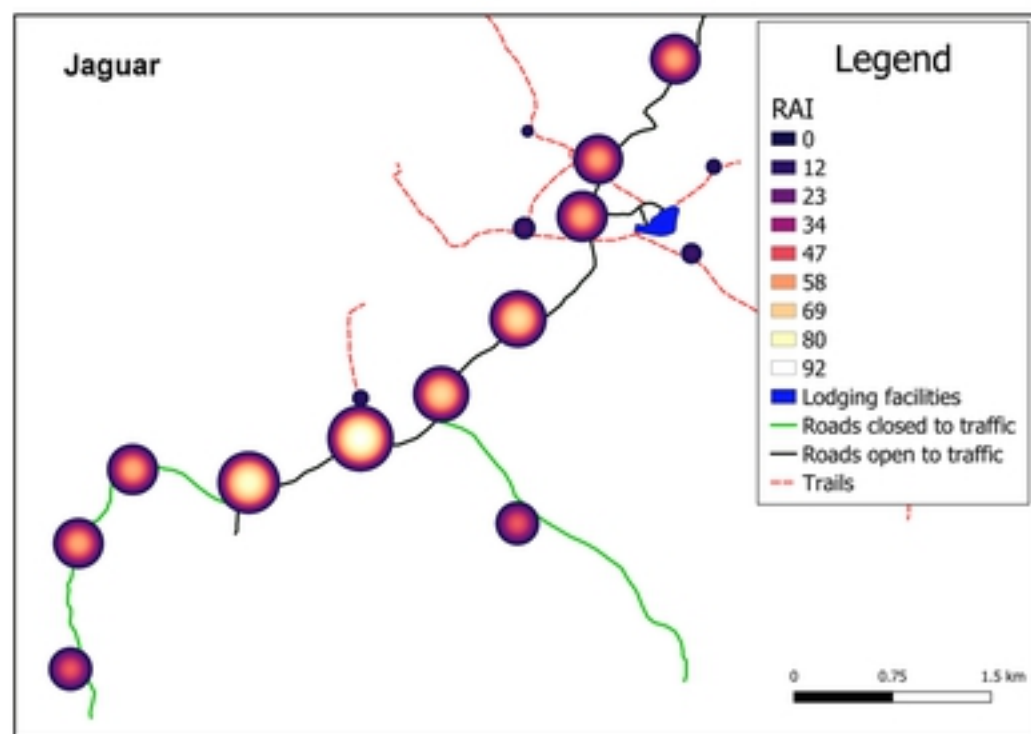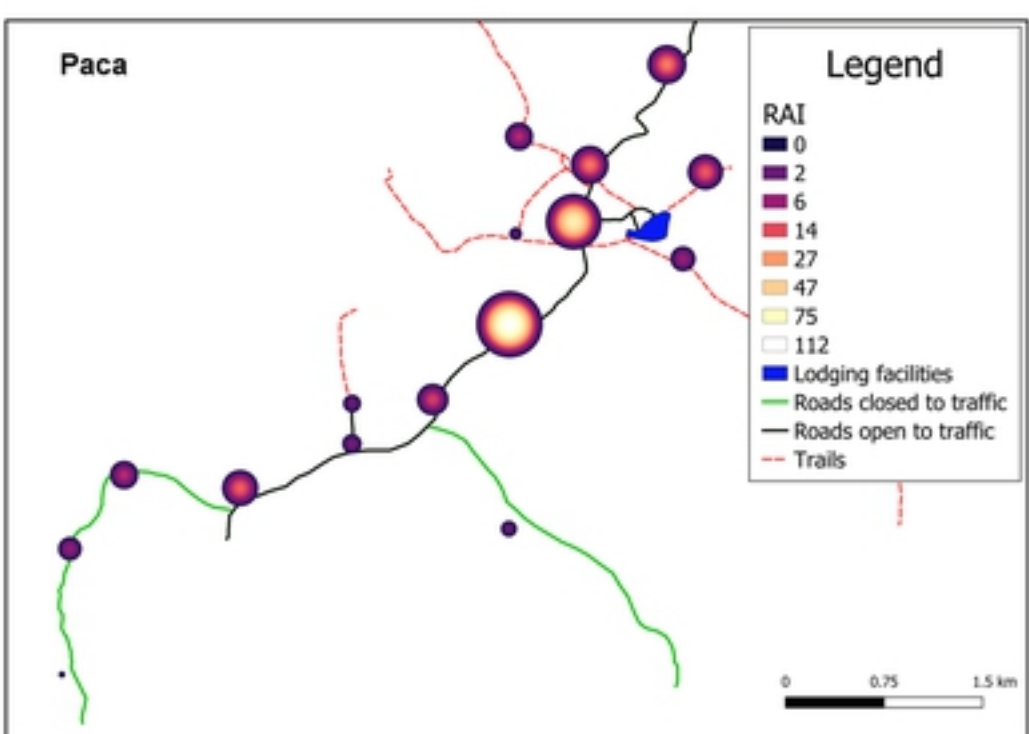

bioRxiv preprint doi: <https://doi.org/10.1101/2021.04.07.438794>; this version posted April 7, 2021. The copyright holder for this preprint (which was not certified by peer review) is the author/funder, who has granted bioRxiv a license to display the preprint in perpetuity. It is made available under aCC-BY 4.0 International license.

Figure

PCA Plot - Covariance - Data 2013-2016 CAP 5 limited abbr.

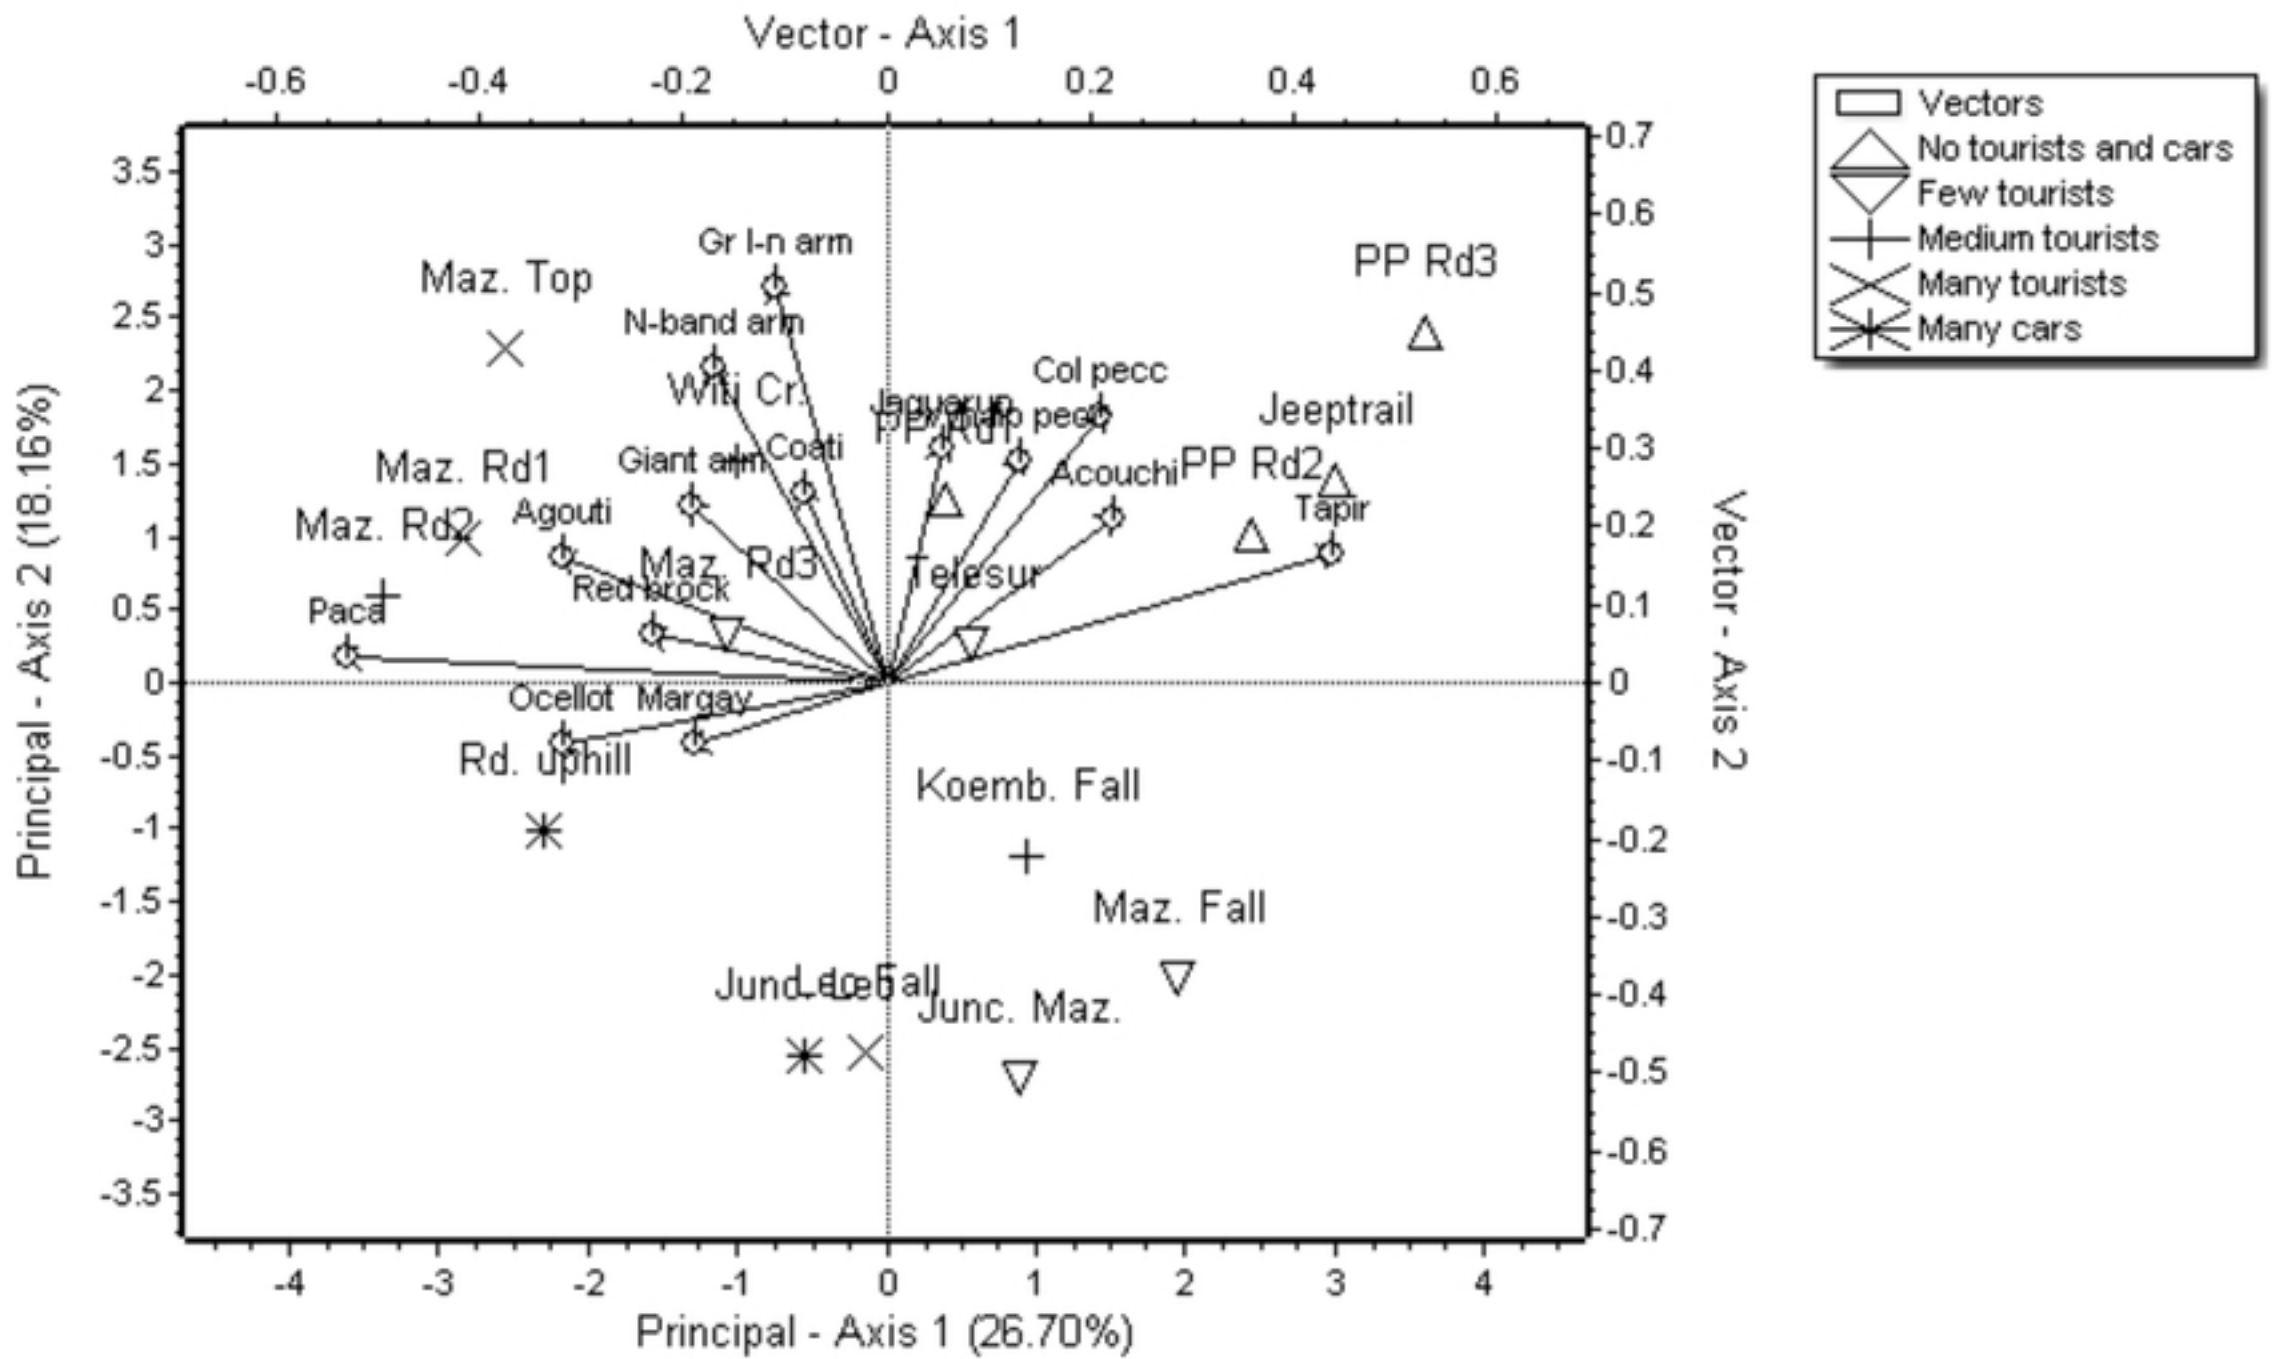

Figure

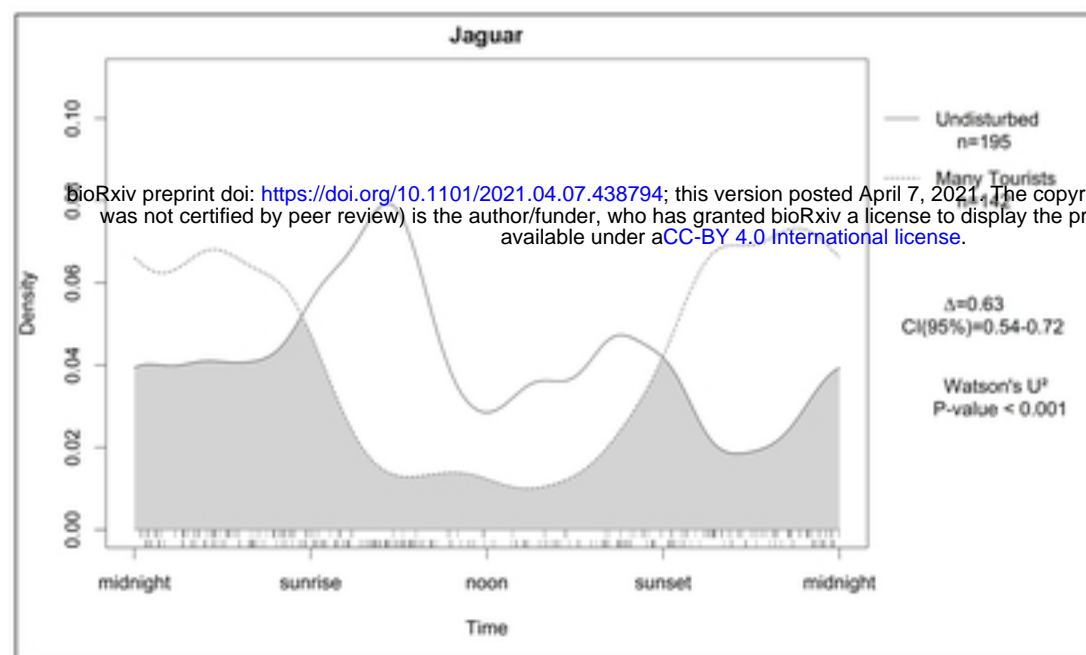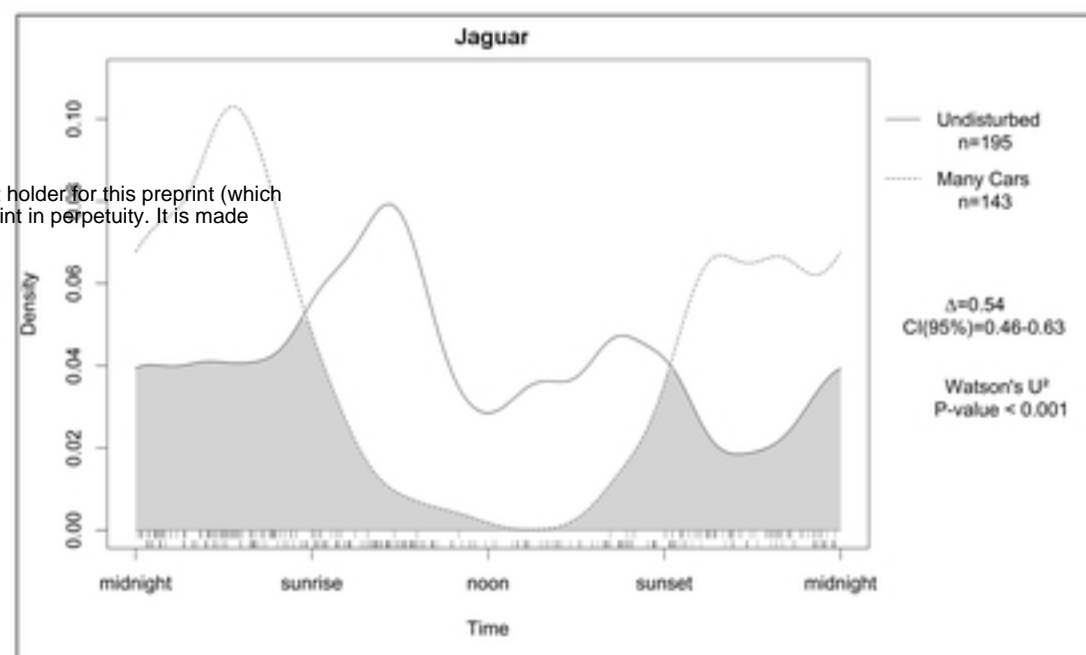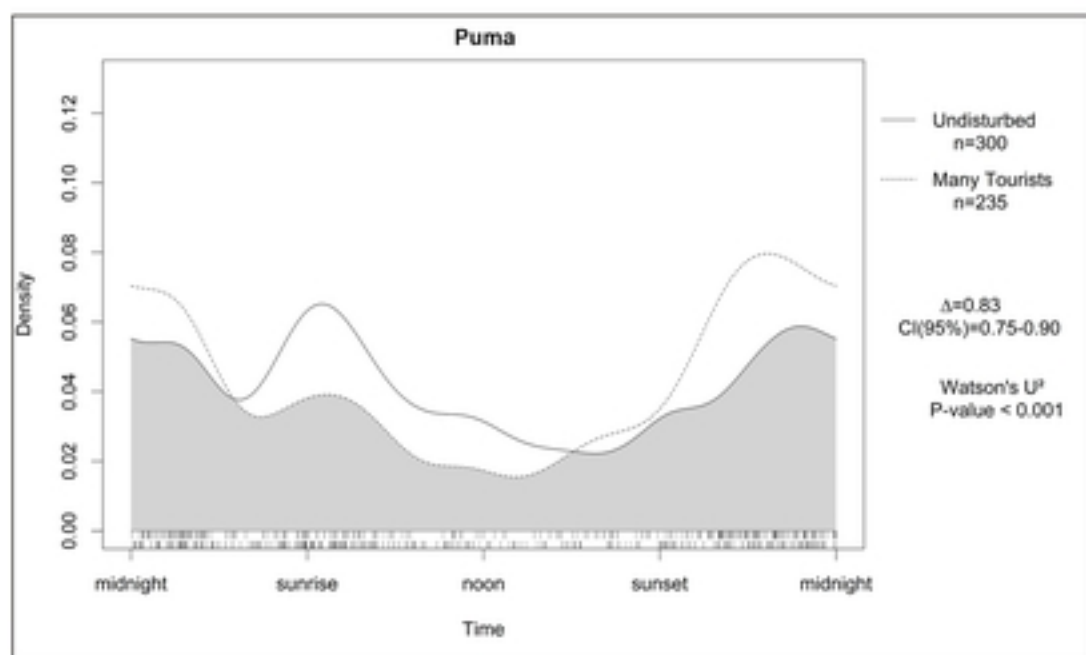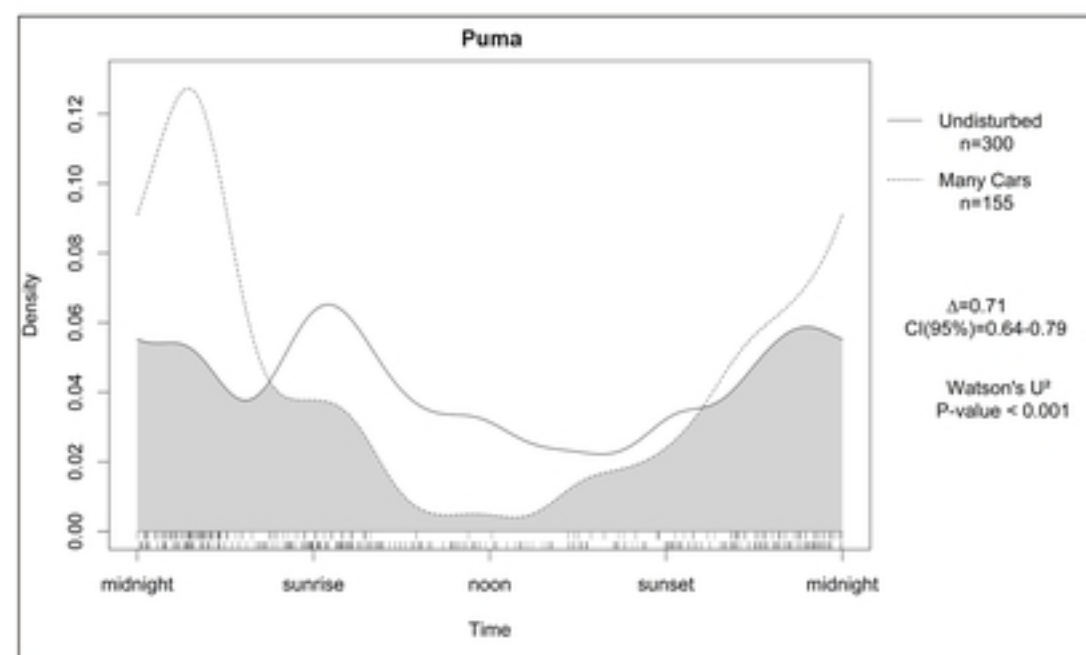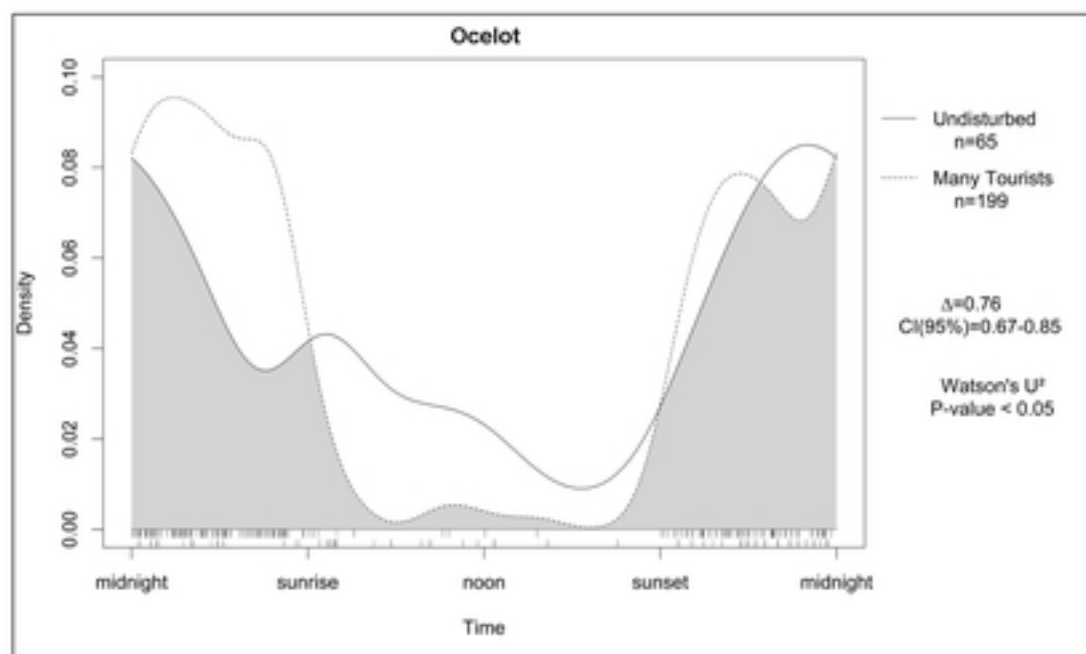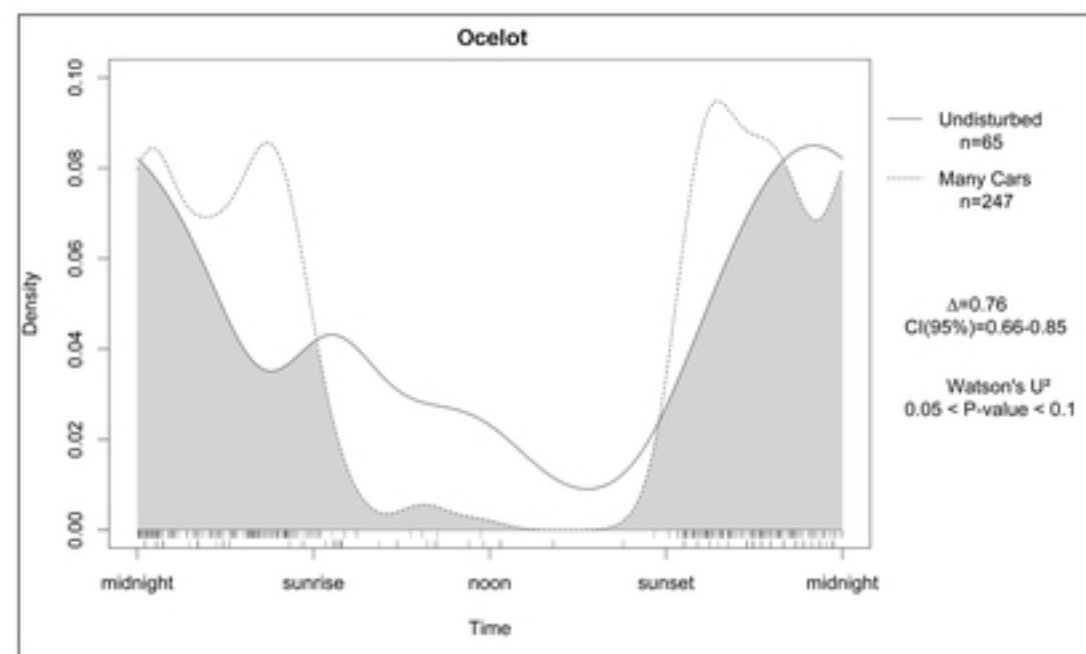

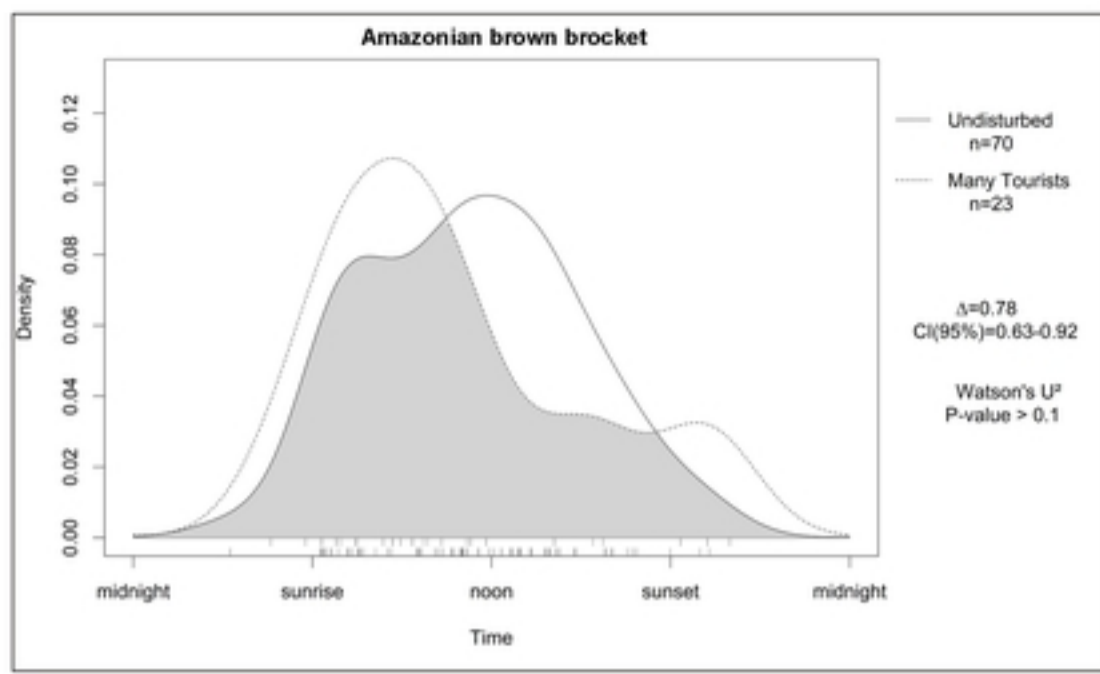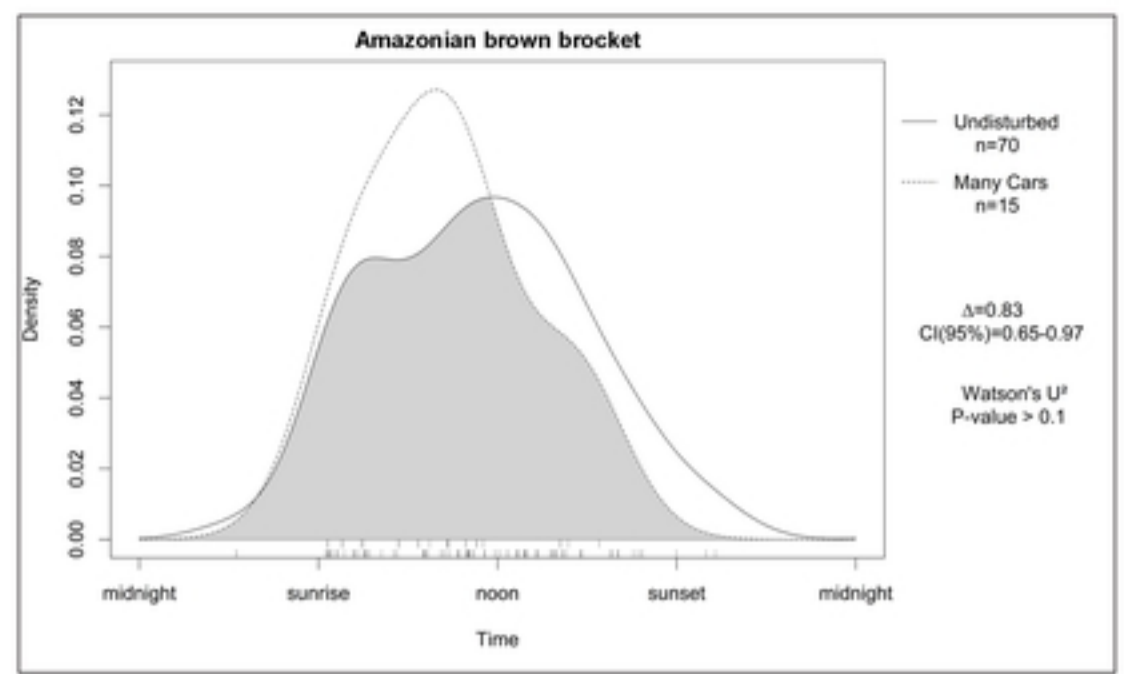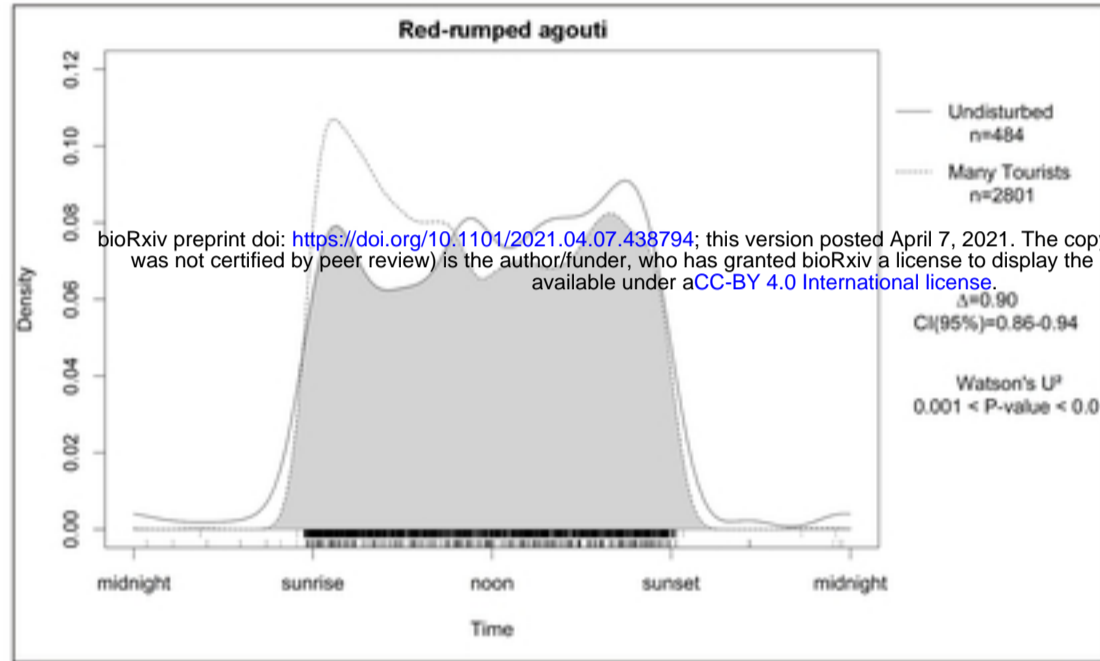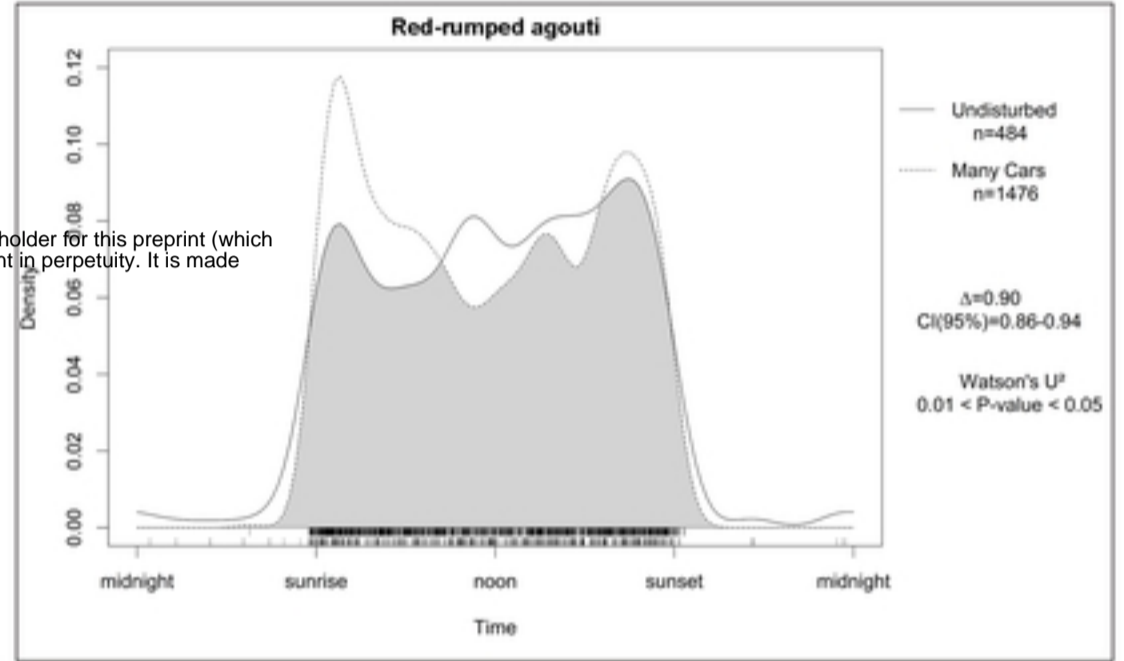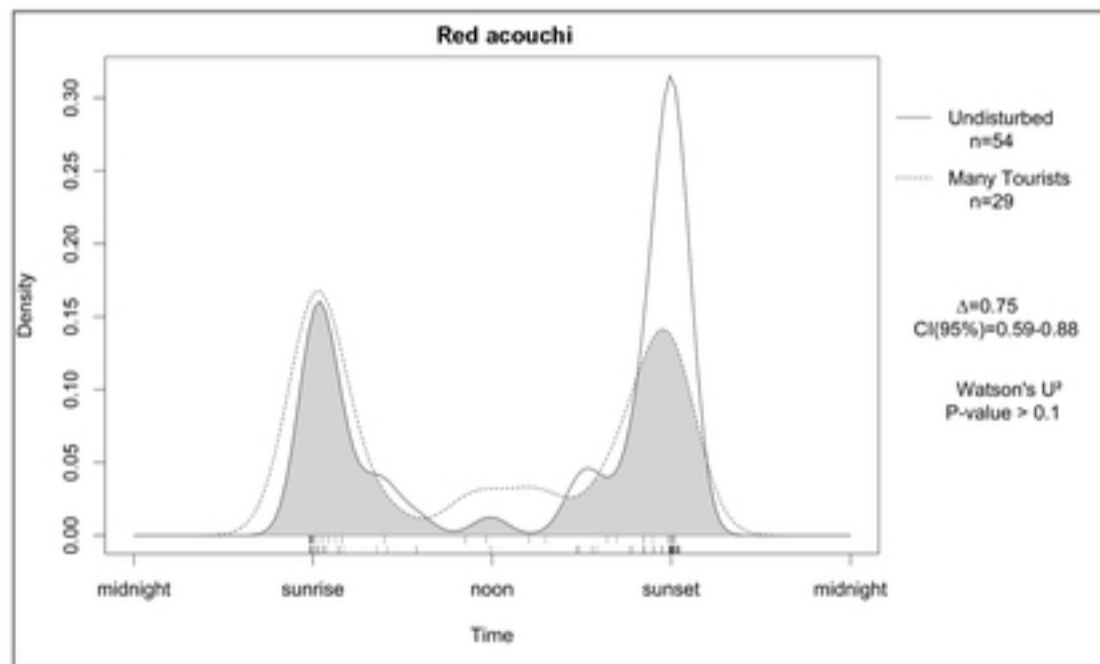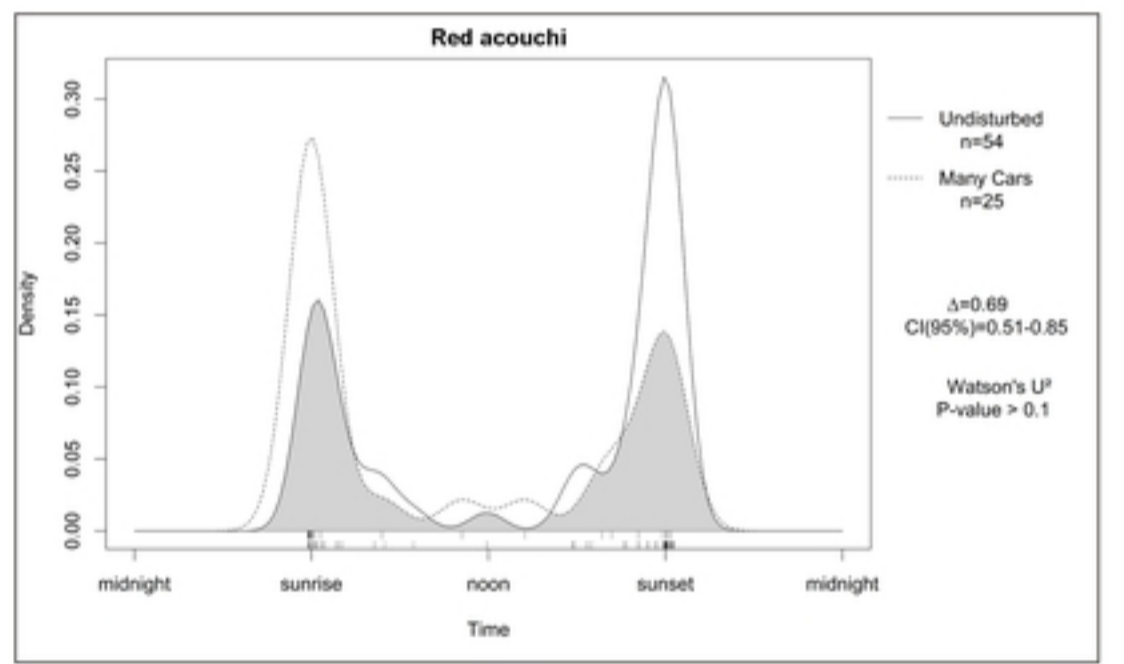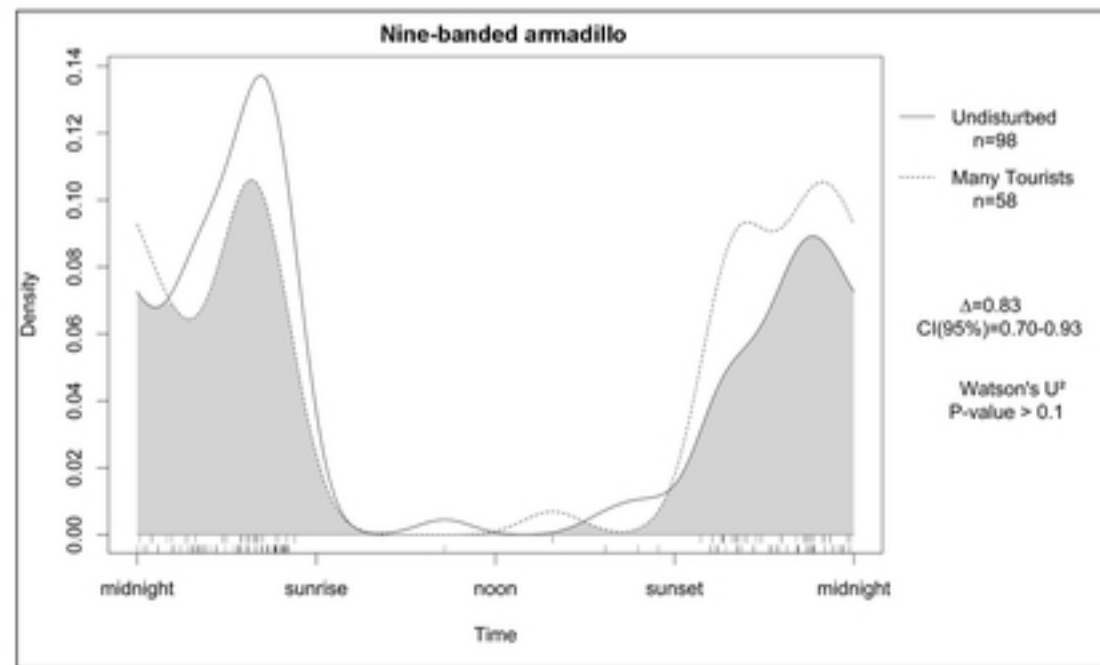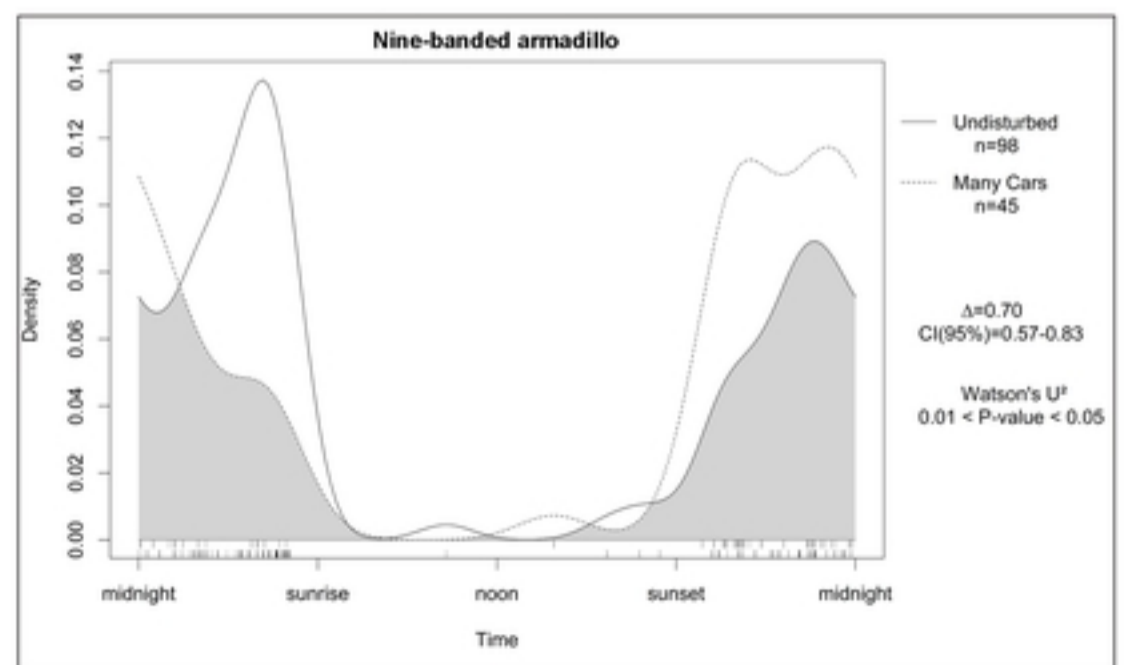

bioRxiv preprint doi: <https://doi.org/10.1101/2021.04.07.438794>; this version posted April 7, 2021. The copyright holder for this preprint (which was not certified by peer review) is the author/funder, who has granted bioRxiv a license to display the preprint in perpetuity. It is made available under aCC-BY 4.0 International license.

Figure

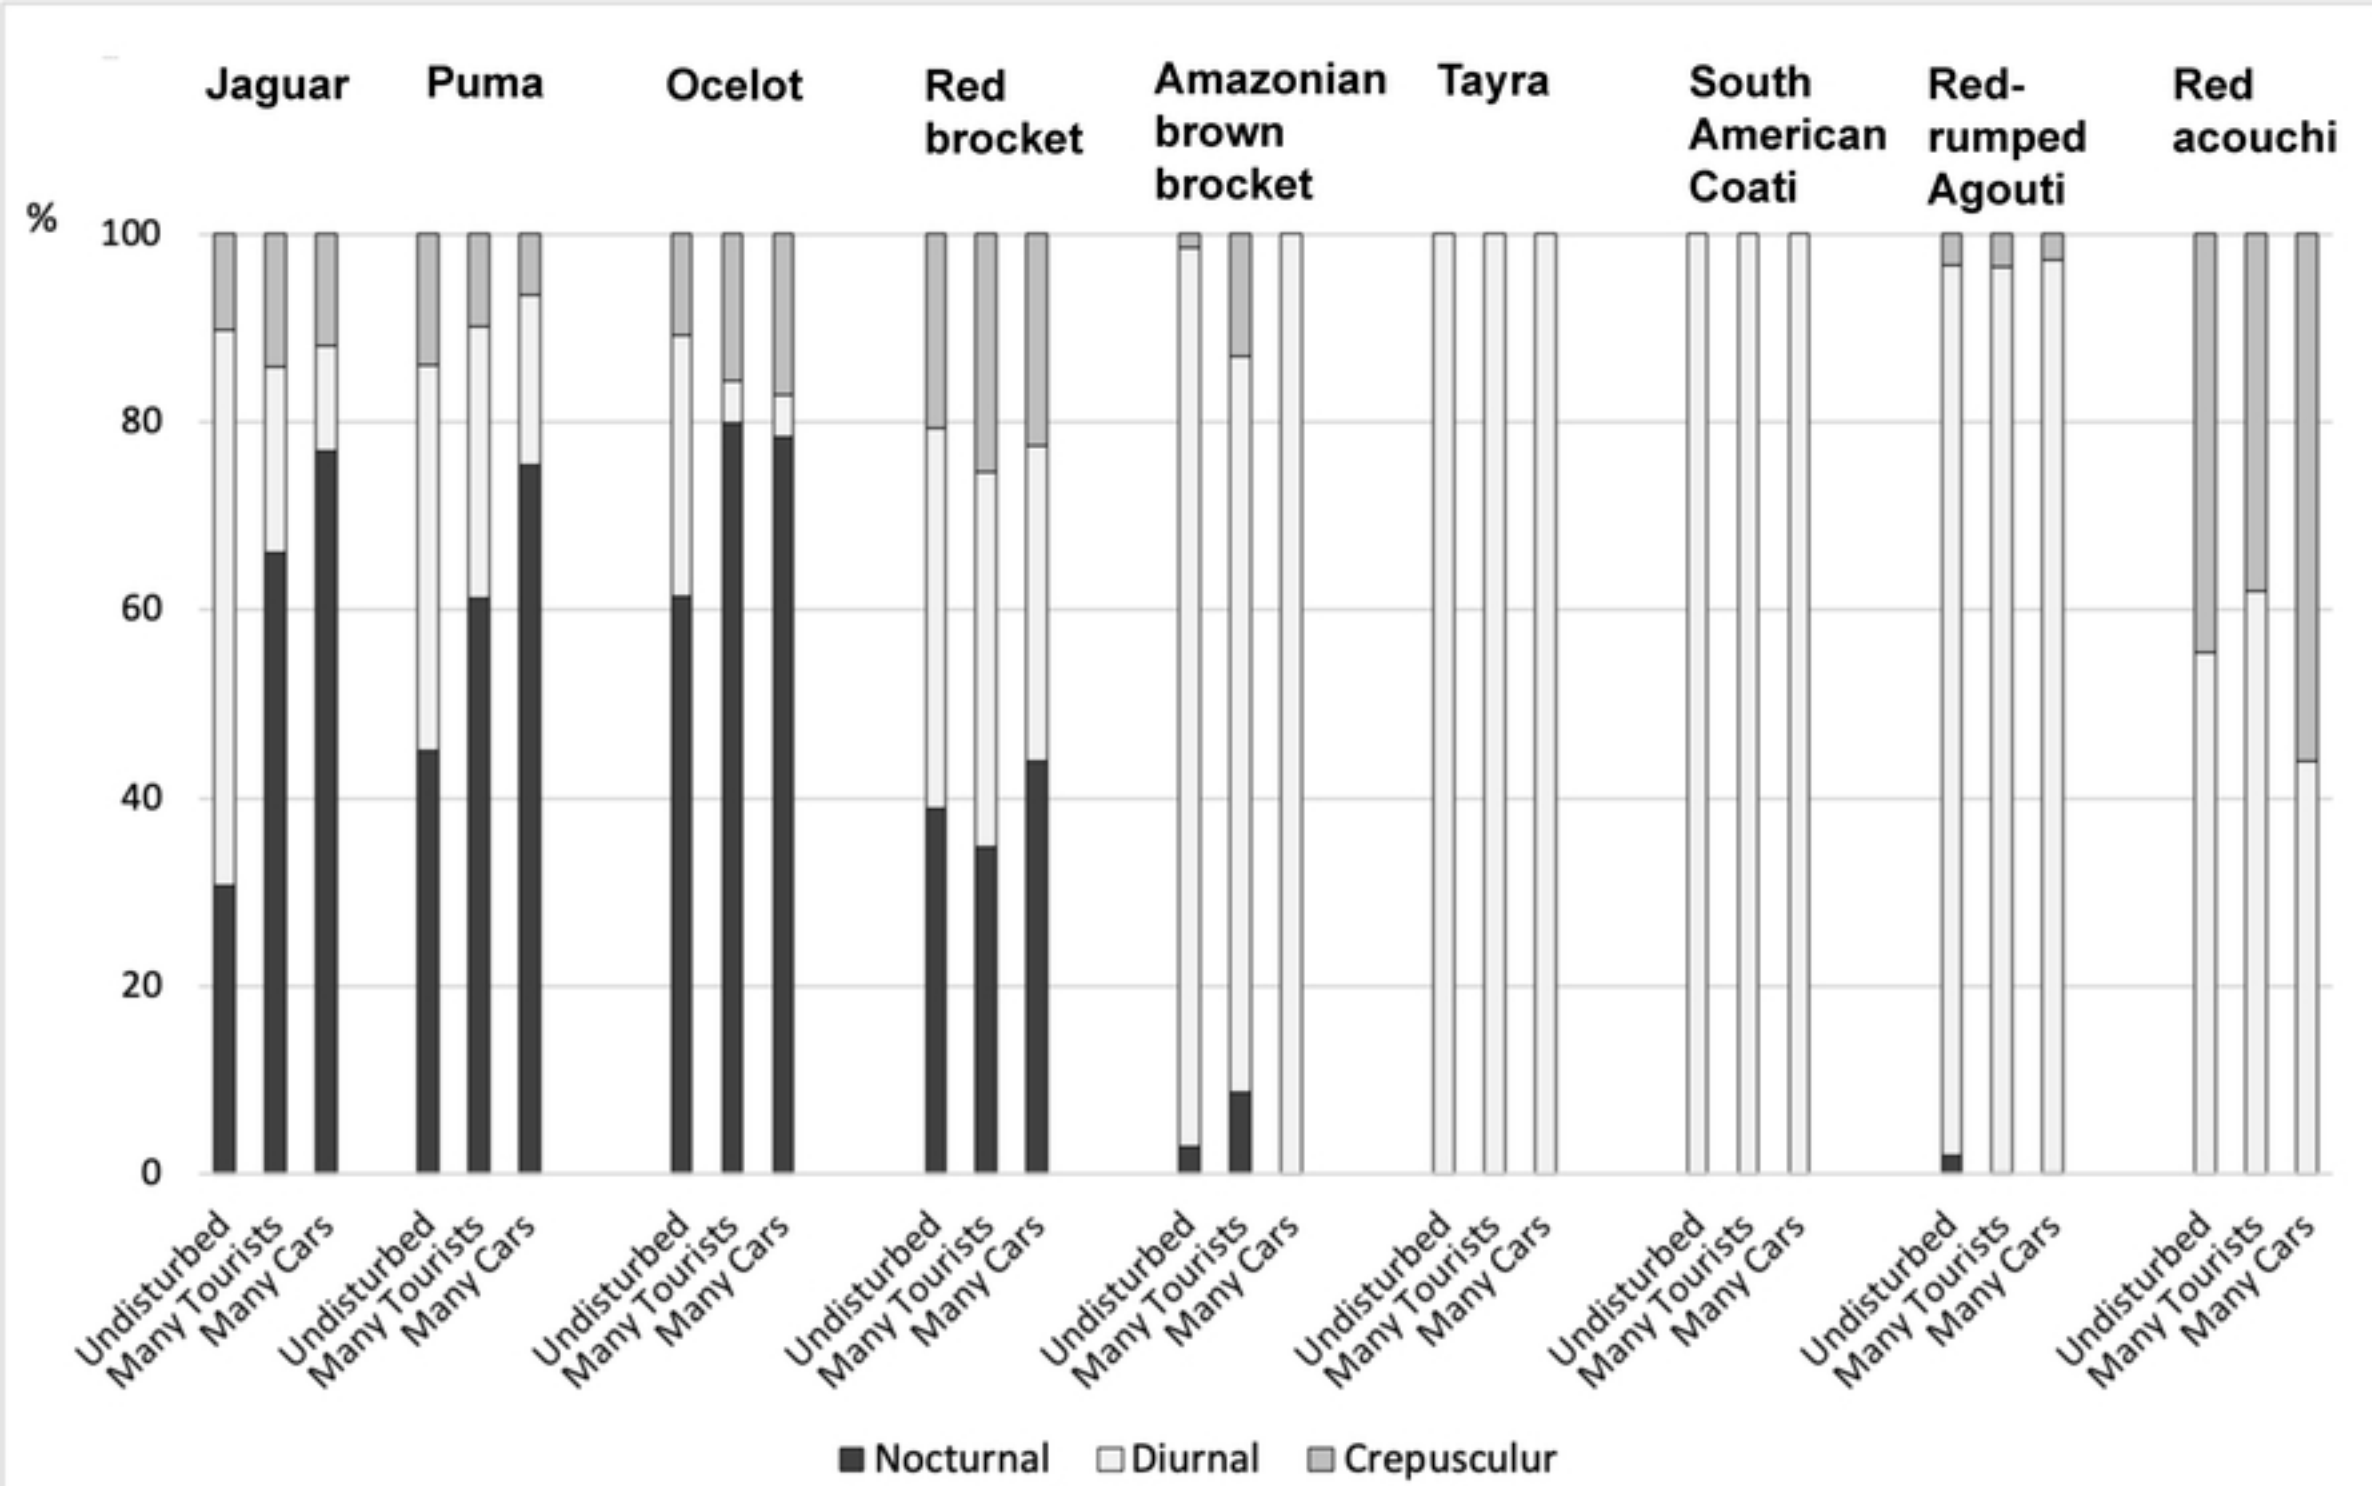

Figure
